# Supplementary material for: Chemical composition and toxicity studies on Lantana camara L. flower essential oil and its in silico binding and pharmacokinetics to superoxide dismutase 1 for amyotrophic lateral sclerosis (ALS) therapy
Source: Royal Society of Chemistry journal article supplement (doi:10.1039/d4ra04281f), 2024-01-01

## Supplementary Materials

### **Chemical composition and toxicity studies on Lantana camara L. flower essential oil and its in-silico binding and pharmacokinetics to superoxide dismutase 1 for amyotrophic lateral sclerosis (ALS) therapy**

Abdullah Haikal, Ahmed R. Ali

#### **Table of Contents**

|                                          |            |
|------------------------------------------|------------|
| Molecular Docking Simulation Methodology | <b>S2</b>  |
| Results from OSIRIS Software (Table 4)   | <b>S3</b>  |
| Results from SwissADME (Table 5)         | <b>S14</b> |

## Molecular Docking Simulation Methodology

Molecular docking simulation was calculated using AutoDock 4.2 included in LigandScout Software. In addition to intramolecular terms and a "full" desolvation model, the AutoDock semi-empirical force field takes directionality in hydrogen bonds into account. The total of the torsional degrees of freedom is used to compute the conformational entropy. The water contribution (dispersion/repulsion, hydrogen bonding, electrostatics, and desolvation) is estimated using pair-wise atomic terms; weights are provided for calibration (based on experimental data), but water molecules are not explicitly represented. In summary, the evaluation phase involves determining the energy of the protein and ligand in their unbound states first. Next, determine the protein-ligand complex's energy. The difference between 1 and 2 is then calculated.

$$\Delta G = (V_{\text{bound}}^{\text{L-L}} - V_{\text{unbound}}^{\text{L-L}}) + (V_{\text{bound}}^{\text{P-P}} - V_{\text{unbound}}^{\text{P-P}}) + (V_{\text{bound}}^{\text{P-L}} - V_{\text{unbound}}^{\text{P-L}} + \Delta S_{\text{conf}})$$

where P stands for protein, L for ligand, V for the pairwise assessments previously indicated, and  $\Delta S_{\text{conf}}$  for conformational entropy lost during binding.

doi:10.1002/jcc.20634.

The following are the parameters used in the docking run. Genetic algorithm runs (the specified number of docking runs using the simulated annealing search engine) was set to 20. RMSD cluster tolerance (the RMSD threshold (in Å) for joining together multiple docking results and show them as one entry in the list of docked poses) was set to 2.0 Å. Number of individuals in population (the size of the initial population for the genetic algorithm search) was set to 150. Max. number of energy evaluations (maximum number of energy evaluations performed during each genetic algorithm search run) was set to 2,500,000. Max. number of generations (maximum number of generations simulated during each genetic algorithm search run) was set to 27,000.

## Results from OSIRIS Software (Table 4):

- 2-Thujene

Enter compound name, SMILES or CAS-no:

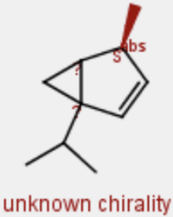

unknown chirality

| Toxicity Risks                               |       |
|----------------------------------------------|-------|
| <input type="radio"/> mutagenic              | ?     |
| <input type="radio"/> tumorigenic            | ?     |
| <input type="radio"/> irritant               | ?     |
| <input type="radio"/> reproductive effective | ?     |
| <b>cLogP</b>                                 | ?     |
| <input type="range" value="2.61"/>           | 2.61  |
| <b>Solubility</b>                            | ?     |
| <input type="range" value="-2.55"/>          | -2.55 |
| <b>Molweight</b>                             | ?     |
| <input type="range" value="136.0"/>          | 136.0 |
| <b>TPSA</b>                                  | ?     |
| <input type="range" value="0.0"/>            | 0.0   |
| <b>Druglikeness</b>                          | ?     |
| <input type="range" value="-1.61"/>          | -1.61 |
| <b>Drug-Score</b>                            | ?     |
| <input type="range" value="0.53"/>           | 0.53  |

- $\alpha$ -pinene

Enter compound name, SMILES or CAS-no:

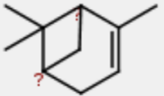

unknown chirality

| Toxicity Risks                               |       |
|----------------------------------------------|-------|
| <input type="radio"/> mutagenic              | ?     |
| <input type="radio"/> tumorigenic            | ?     |
| <input type="radio"/> irritant               | ?     |
| <input type="radio"/> reproductive effective | ?     |
| <b>cLogP</b>                                 | ?     |
| <input type="range" value="2.72"/>           | 2.72  |
| <b>Solubility</b>                            | ?     |
| <input type="range" value="-2.52"/>          | -2.52 |
| <b>Molweight</b>                             | ?     |
| <input type="range" value="136.0"/>          | 136.0 |
| <b>TPSA</b>                                  | ?     |
| <input type="range" value="0.0"/>            | 0.0   |
| <b>Druglikeness</b>                          | ?     |
| <input type="range" value="-1.8"/>           | -1.8  |
| <b>Drug-Score</b>                            | ?     |
| <input type="range" value="0.31"/>           | 0.31  |

- Camphene

Enter compound name, SMILES or CAS-no:

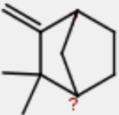

unknown chirality

|    |      |
|----|------|
|    |      |
|    |      |
|    |      |
|    |      |
|    |      |
|    |      |
|    |      |
|    |      |
|    |      |
|    |      |
|    |      |
| C  | Si   |
| N  | P    |
| O  | S    |
| F  | Cl   |
| Br | I    |
| H  | ?... |

| Toxicity Risks   |                            |
|------------------|----------------------------|
|                  | mutagenic [?]              |
|                  | tumorigenic [?]            |
|                  | irritant [?]               |
|                  | reproductive effective [?] |
| cLogP [?]        |                            |
|                  | 2.8                        |
| Solubility [?]   |                            |
|                  | -2.69                      |
| Molweight [?]    |                            |
|                  | 136.0                      |
| TPSA [?]         |                            |
|                  | 0.0                        |
| Druglikeness [?] |                            |
|                  | -5.86                      |
| Drug-Score [?]   |                            |
|                  | 0.27                       |

- Sabinene

Enter compound name, SMILES or CAS-no:

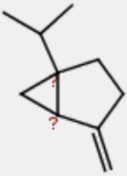

unknown chirality

|    |      |
|----|------|
|    |      |
|    |      |
|    |      |
|    |      |
|    |      |
|    |      |
|    |      |
|    |      |
|    |      |
|    |      |
|    |      |
| C  | Si   |
| N  | P    |
| O  | S    |
| F  | Cl   |
| Br | I    |
| H  | ?... |

| Toxicity Risks   |                            |
|------------------|----------------------------|
|                  | mutagenic [?]              |
|                  | tumorigenic [?]            |
|                  | irritant [?]               |
|                  | reproductive effective [?] |
| cLogP [?]        |                            |
|                  | 2.86                       |
| Solubility [?]   |                            |
|                  | -2.69                      |
| Molweight [?]    |                            |
|                  | 136.0                      |
| TPSA [?]         |                            |
|                  | 0.0                        |
| Druglikeness [?] |                            |
|                  | -6.78                      |
| Drug-Score [?]   |                            |
|                  | 0.45                       |

- $\beta$ -Myrcene

Enter compound name, SMILES or CAS-no:

|    |      |
|----|------|
|    |      |
|    |      |
|    |      |
|    |      |
|    |      |
|    |      |
|    |      |
|    |      |
|    |      |
| C  | Si   |
| N  | P    |
| O  | S    |
| F  | Cl   |
| Br | I    |
| H  | ?... |

**Toxicity Risks**

- mutagenic
- tumorigenic
- irritant
- reproductive effective

**cLogP**

4.29

**Solubility**

-2.5

**Molweight**

136.0

**TPSA**

0.0

**Druglikeness**

-7.82

**Drug-Score**

0.09

- 3-Carene

Enter compound name, SMILES or CAS-no:

|    |      |
|----|------|
|    |      |
|    |      |
|    |      |
|    |      |
|    |      |
|    |      |
|    |      |
|    |      |
|    |      |
| C  | Si   |
| N  | P    |
| O  | S    |
| F  | Cl   |
| Br | I    |
| H  | ?... |

unknown chirality

**Toxicity Risks**

- mutagenic
- tumorigenic
- irritant
- reproductive effective

**cLogP**

2.72

**Solubility**

-2.52

**Molweight**

136.0

**TPSA**

0.0

**Druglikeness**

-2.9

**Drug-Score**

0.17

- **o-Cymene**

Enter compound name, SMILES or CAS-no:

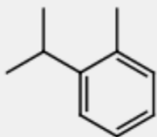

**Toxicity Risks**

- mutagenic [?]
- tumorigenic [?]
- irritant [?]
- reproductive effective [?]

**cLogP** [?]  
3.19

**Solubility** [?]  
-2.83

**Molweight** [?]  
134.0

**TPSA** [?]  
0.0

**Druglikeness** [?]  
-2.42

**Drug-Score** [?]  
0.47

- **Eucalyptol**

Enter compound name, SMILES or CAS-no:

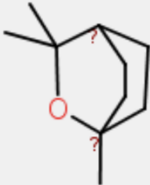

**Toxicity Risks**

- mutagenic [?]
- tumorigenic [?]
- irritant [?]
- reproductive effective [?]

**cLogP** [?]  
2.11

**Solubility** [?]  
-2.48

**Molweight** [?]  
154.0

**TPSA** [?]  
9.23

**Druglikeness** [?]  
-3.21

**Drug-Score** [?]  
0.17

- $\beta$ -cis-Ocimene

Enter compound name, SMILES or CAS-no:

|    |      |
|----|------|
|    |      |
|    |      |
|    |      |
|    |      |
|    |      |
|    |      |
|    |      |
|    |      |
|    |      |
|    |      |
| C  | Si   |
| N  | P    |
| O  | S    |
| F  | Cl   |
| Br | I    |
| H  | ?... |

**Toxicity Risks**

- mutagenic
- tumorigenic
- irritant
- reproductive effective

**cLogP**

4.23

**Solubility**

-2.33

**Molweight**

136.0

**TPSA**

0.0

**Druglikeness**

-5.48

**Drug-Score**

0.41

- $\gamma$ -Terpinene

Enter compound name, SMILES or CAS-no:

|    |      |
|----|------|
|    |      |
|    |      |
|    |      |
|    |      |
|    |      |
|    |      |
|    |      |
|    |      |
|    |      |
|    |      |
| C  | Si   |
| N  | P    |
| O  | S    |
| F  | Cl   |
| Br | I    |
| H  | ?... |

**Toxicity Risks**

- mutagenic
- tumorigenic
- irritant
- reproductive effective

**cLogP**

3.05

**Solubility**

-2.37

**Molweight**

136.0

**TPSA**

0.0

**Druglikeness**

-2.82

**Drug-Score**

0.29

- Terpinen-4-ol

Enter compound name, SMILES or CAS-no:

unknown chirality

**Toxicity Risks**

- mutagenic
- tumorigenic
- irritant
- reproductive effective

**cLogP**

2.34

**Solubility**

-2.19

**Molweight**

154.0

**TPSA**

20.23

**Druglikeness**

-7.41

**Drug-Score**

0.28

- $\alpha$ -Copaene

Enter compound name, SMILES or CAS-no:

unknown chirality

**Toxicity Risks**

- mutagenic
- tumorigenic
- irritant
- reproductive effective

**cLogP**

3.98

**Solubility**

-3.62

**Molweight**

204.0

**TPSA**

0.0

**Druglikeness**

-6.25

**Drug-Score**

0.23



- Caryophyllene

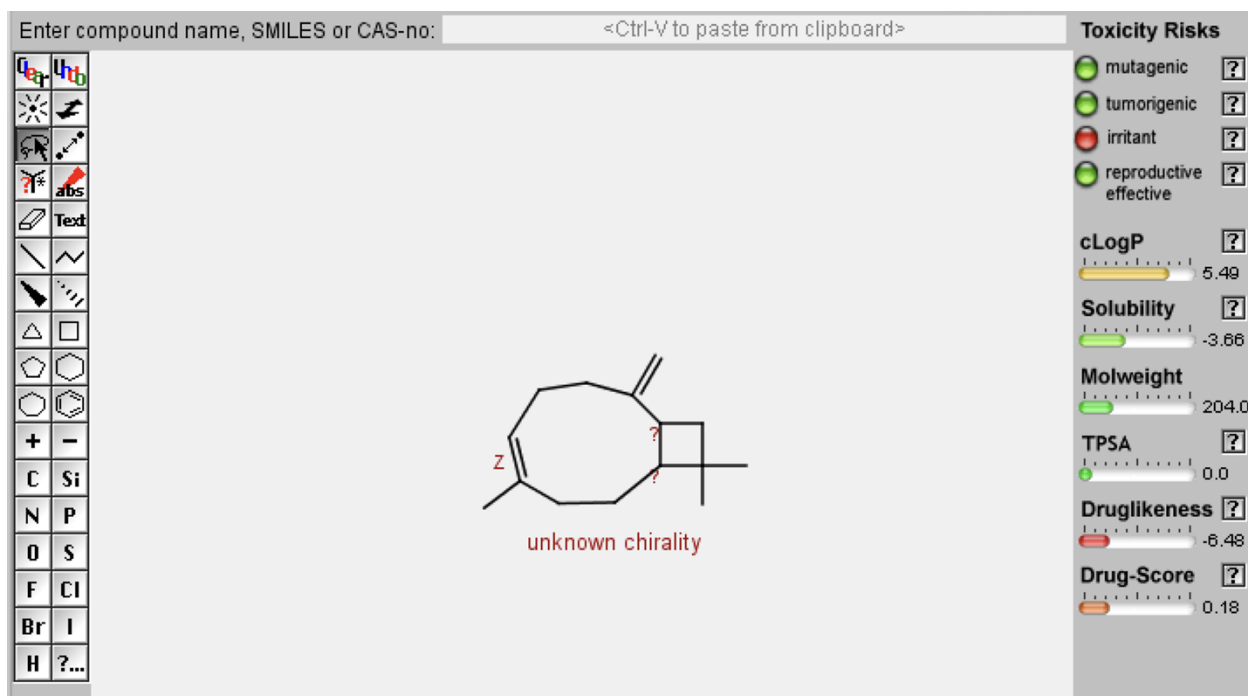

- Humulene

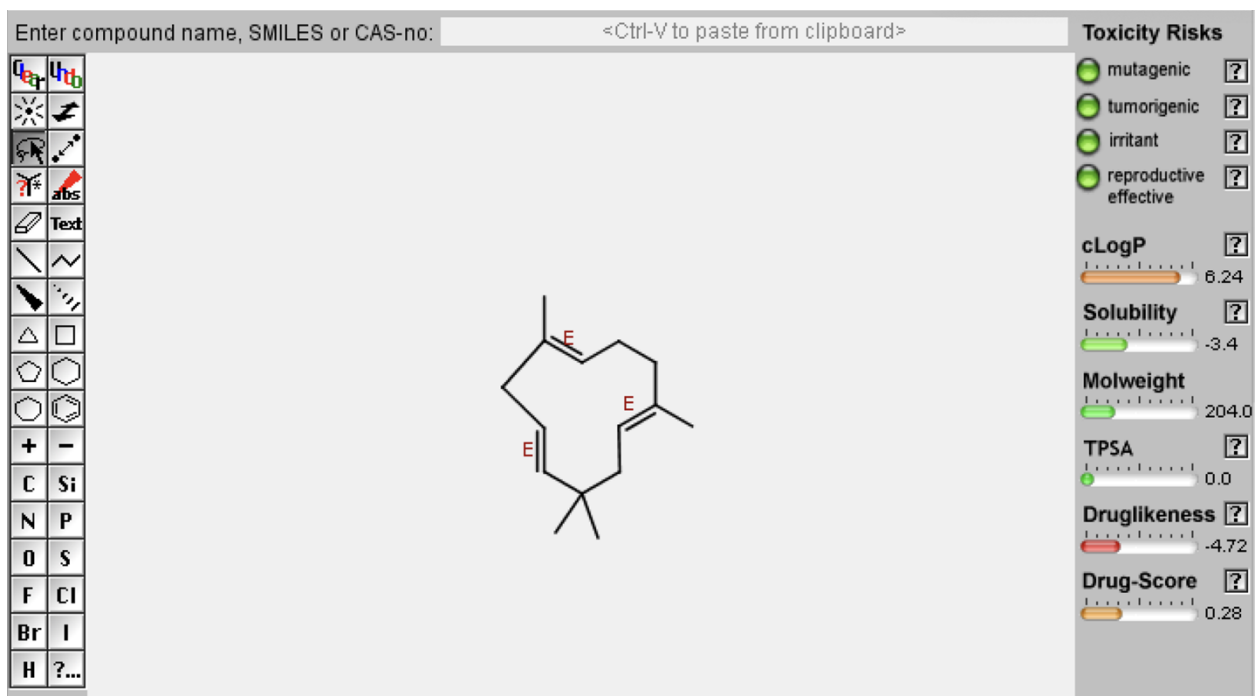

- **Germacrene D**

Enter compound name, SMILES or CAS-no:

|  |  |
|--|--|
|  |  |
|  |  |
|  |  |
|  |  |
|  |  |
|  |  |
|  |  |
|  |  |
|  |  |
|  |  |
|  |  |
|  |  |
|  |  |
|  |  |
|  |  |
|  |  |
|  |  |
|  |  |
|  |  |

unknown chirality

**Toxicity Risks**

- mutagenic
- tumorigenic
- irritant
- reproductive effective

**cLogP**

5.96

**Solubility**

-3.55

**Molweight**

204.0

**TPSA**

0.0

**Druglikeness**

-10.24

**Drug-Score**

0.28

- **Bicyclogermacrene**

Enter compound name, SMILES or CAS-no:

|  |  |
|--|--|
|  |  |
|  |  |
|  |  |
|  |  |
|  |  |
|  |  |
|  |  |
|  |  |
|  |  |
|  |  |
|  |  |
|  |  |
|  |  |
|  |  |
|  |  |
|  |  |
|  |  |
|  |  |
|  |  |

unknown chirality

**Toxicity Risks**

- mutagenic
- tumorigenic
- irritant
- reproductive effective

**cLogP**

5.53

**Solubility**

-3.49

**Molweight**

204.0

**TPSA**

0.0

**Druglikeness**

-4.88

**Drug-Score**

0.07



- Caryophyllene oxide

Enter compound name, SMILES or CAS-no:

|    |      |
|----|------|
|    |      |
|    |      |
|    |      |
|    |      |
|    |      |
|    |      |
|    |      |
|    |      |
|    |      |
|    |      |
|    |      |
| C  | Si   |
| N  | P    |
| O  | S    |
| F  | Cl   |
| Br | I    |
| H  | ?... |

unknown chirality

**Toxicity Risks**

- mutagenic
- tumorigenic
- irritant
- reproductive effective

**cLogP**

4.06

**Solubility**

-3.56

**Molweight**

220.0

**TPSA**

12.53

**Druglikeness**

-4.77

**Drug-Score**

0.25

- Longifolenaldehyde

Enter compound name, SMILES or CAS-no:

|    |      |
|----|------|
|    |      |
|    |      |
|    |      |
|    |      |
|    |      |
|    |      |
|    |      |
|    |      |
|    |      |
|    |      |
|    |      |
| C  | Si   |
| N  | P    |
| O  | S    |
| F  | Cl   |
| Br | I    |
| H  | ?... |

unknown chirality

**Toxicity Risks**

- mutagenic
- tumorigenic
- irritant
- reproductive effective

**cLogP**

2.95

**Solubility**

-3.61

**Molweight**

220.0

**TPSA**

17.07

**Druglikeness**

-7.3

**Drug-Score**

0.25

- Isospathulenol

Enter compound name, SMILES or CAS-no:

|    |      |
|----|------|
|    |      |
|    |      |
|    |      |
|    |      |
|    |      |
|    |      |
|    |      |
|    |      |
|    |      |
|    |      |
| C  | Si   |
| N  | P    |
| O  | S    |
| F  | Cl   |
| Br | I    |
| H  | ?... |

HO  
unknown chirality

**Toxicity Risks**

- mutagenic ?
- tumorigenic ?
- irritant ?
- reproductive effective ?

**cLogP** ?

3.27

**Solubility** ?

-3.14

**Molweight** ?

220.0

**TPSA** ?

20.23

**Druglikeness** ?

-1.87

**Drug-Score** ?

0.17

- Aromadendrene oxide I

Enter compound name, SMILES or CAS-no:

|    |      |
|----|------|
|    |      |
|    |      |
|    |      |
|    |      |
|    |      |
|    |      |
|    |      |
|    |      |
|    |      |
|    |      |
| C  | Si   |
| N  | P    |
| O  | S    |
| F  | Cl   |
| Br | I    |
| H  | ?... |

unknown chirality

**Toxicity Risks**

- mutagenic ?
- tumorigenic ?
- irritant ?
- reproductive effective ?

**cLogP** ?

2.92

**Solubility** ?

-3.41

**Molweight** ?

220.0

**TPSA** ?

12.53

**Druglikeness** ?

-4.97

**Drug-Score** ?

0.09

## Results from SwissADME (Table 5):

- 2-Thujene

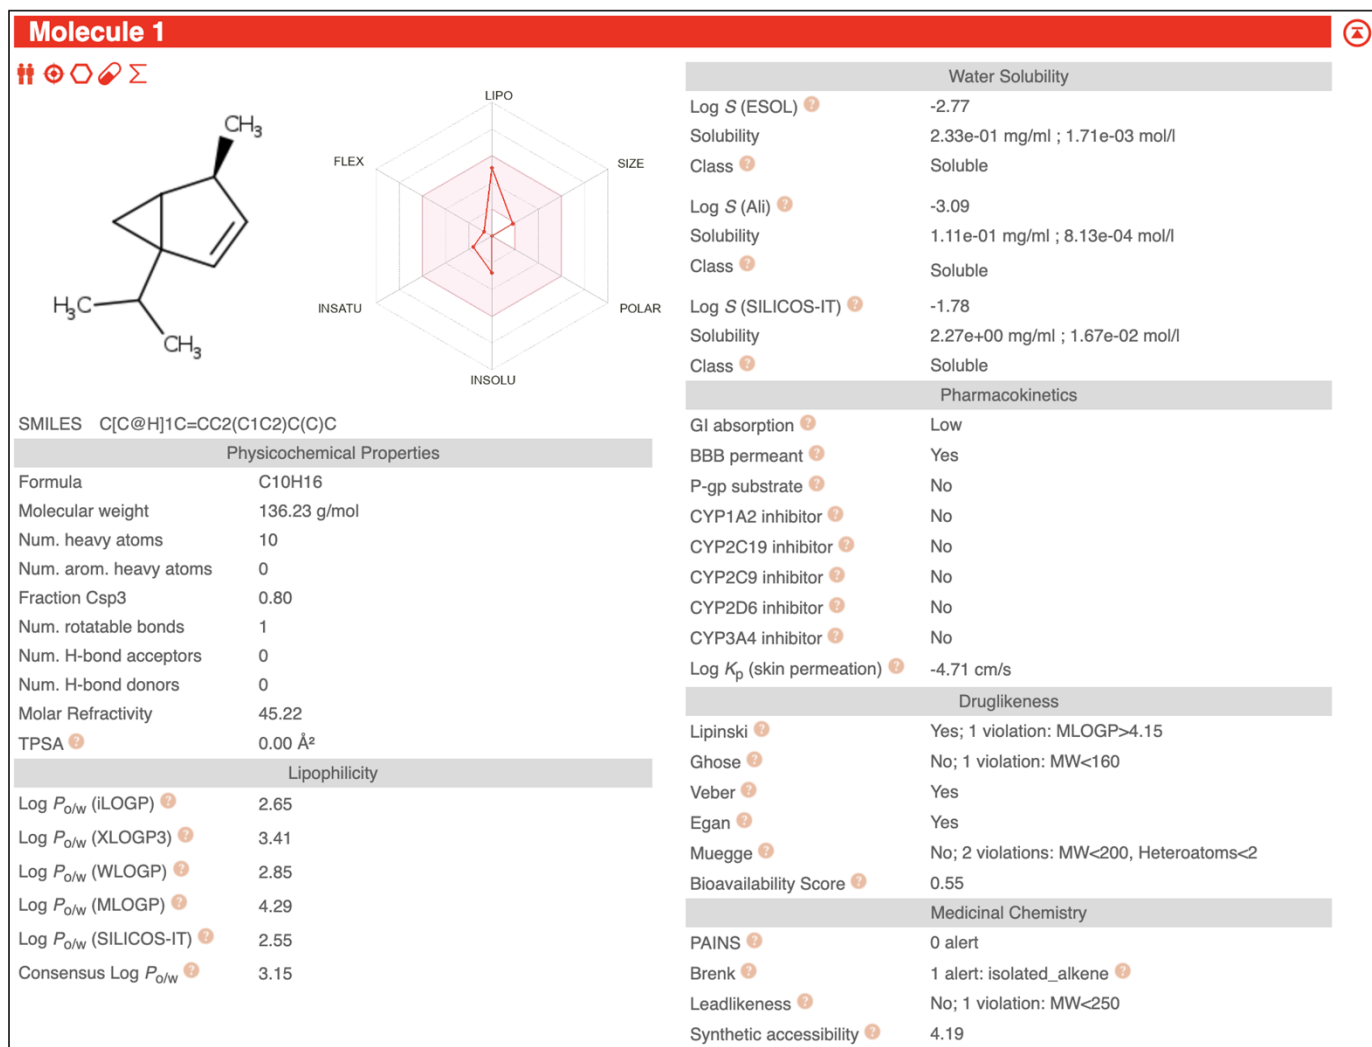

- $\alpha$ -pinene

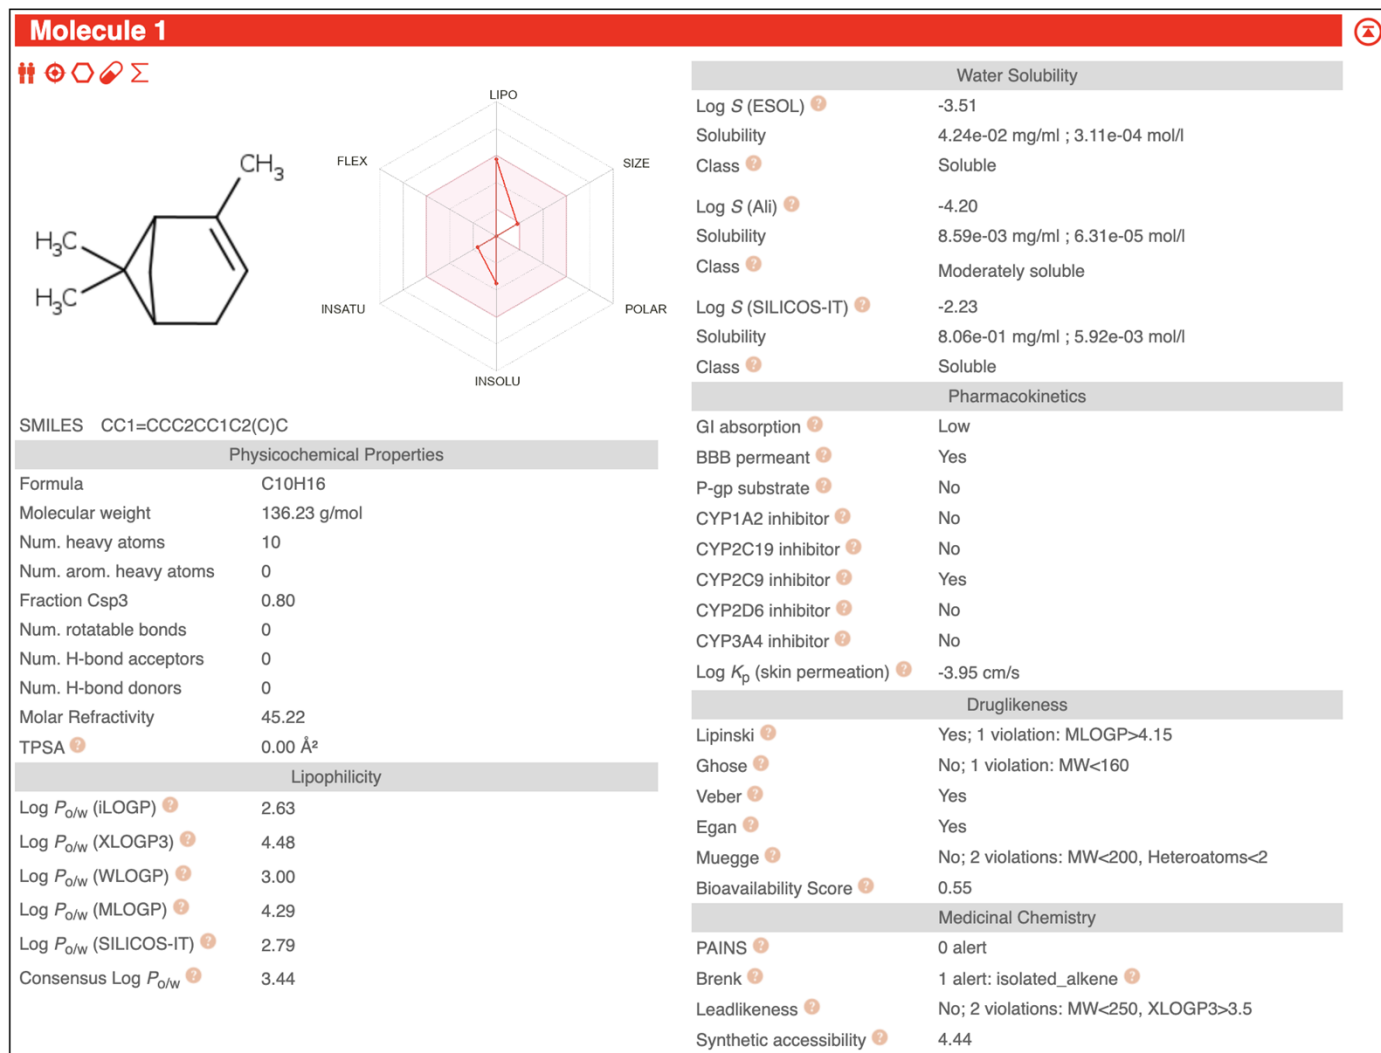

• Camphene

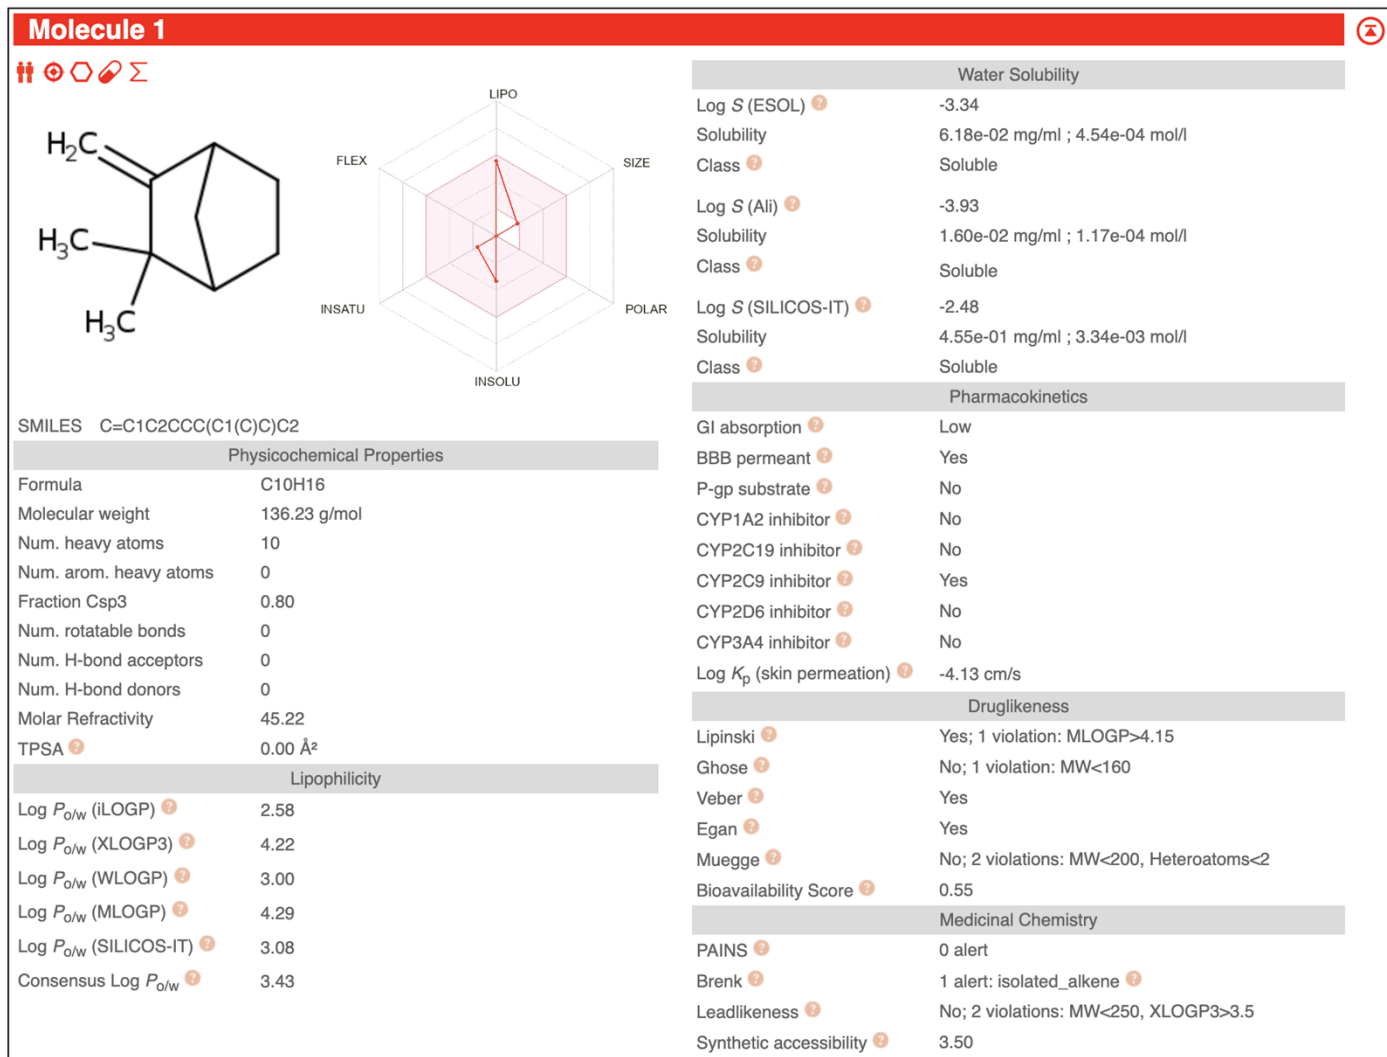



• Sabinene

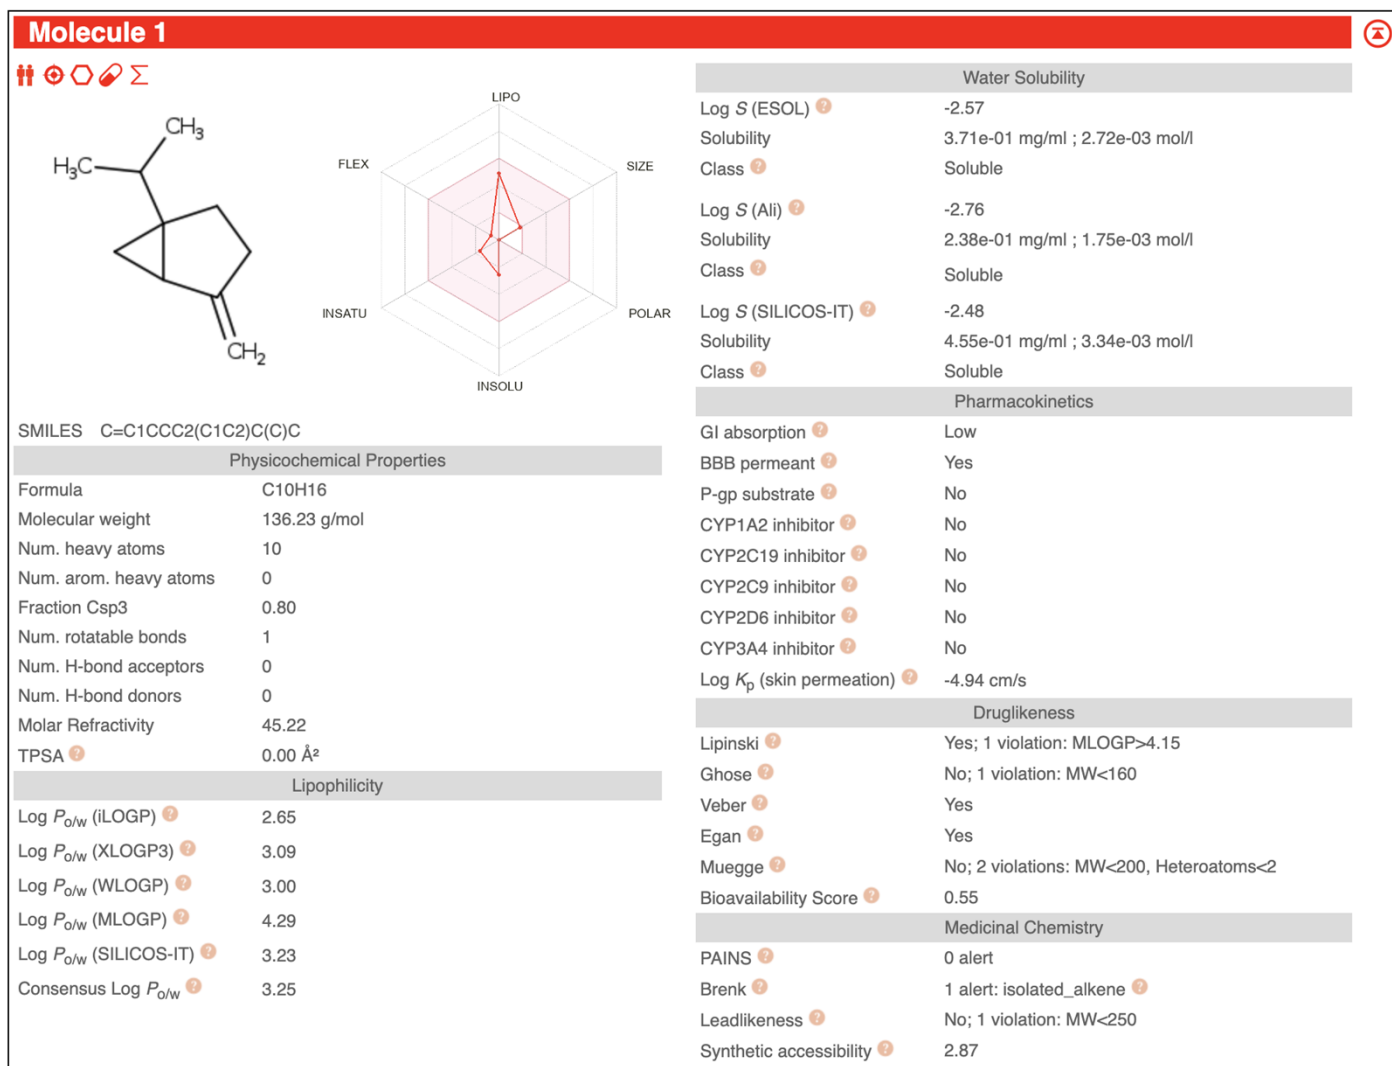

•  $\beta$ -Myrcene

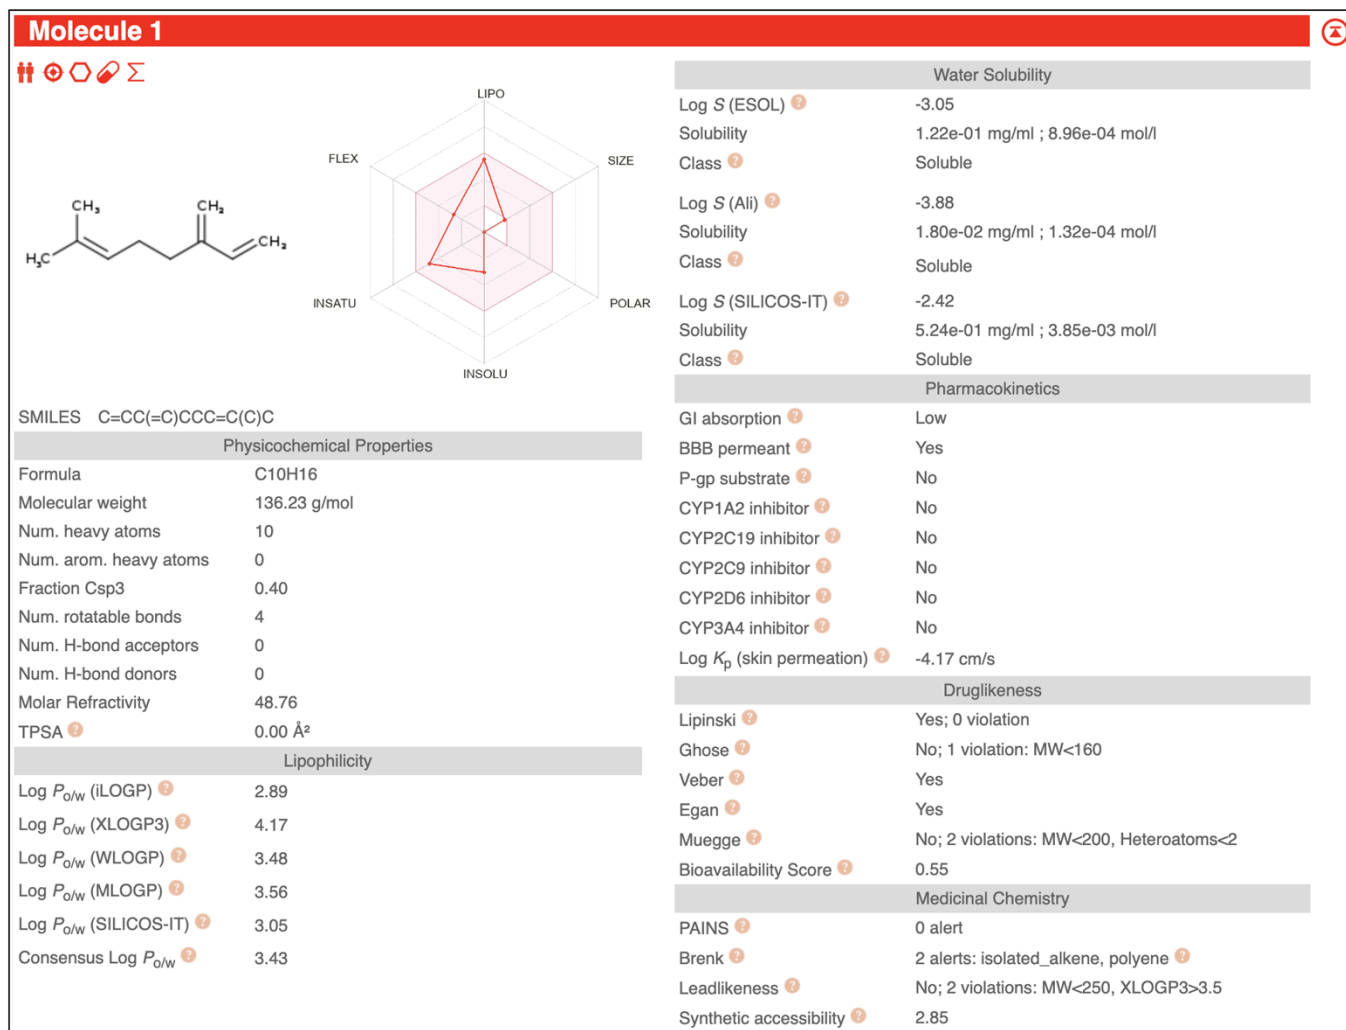

• 3-Carene

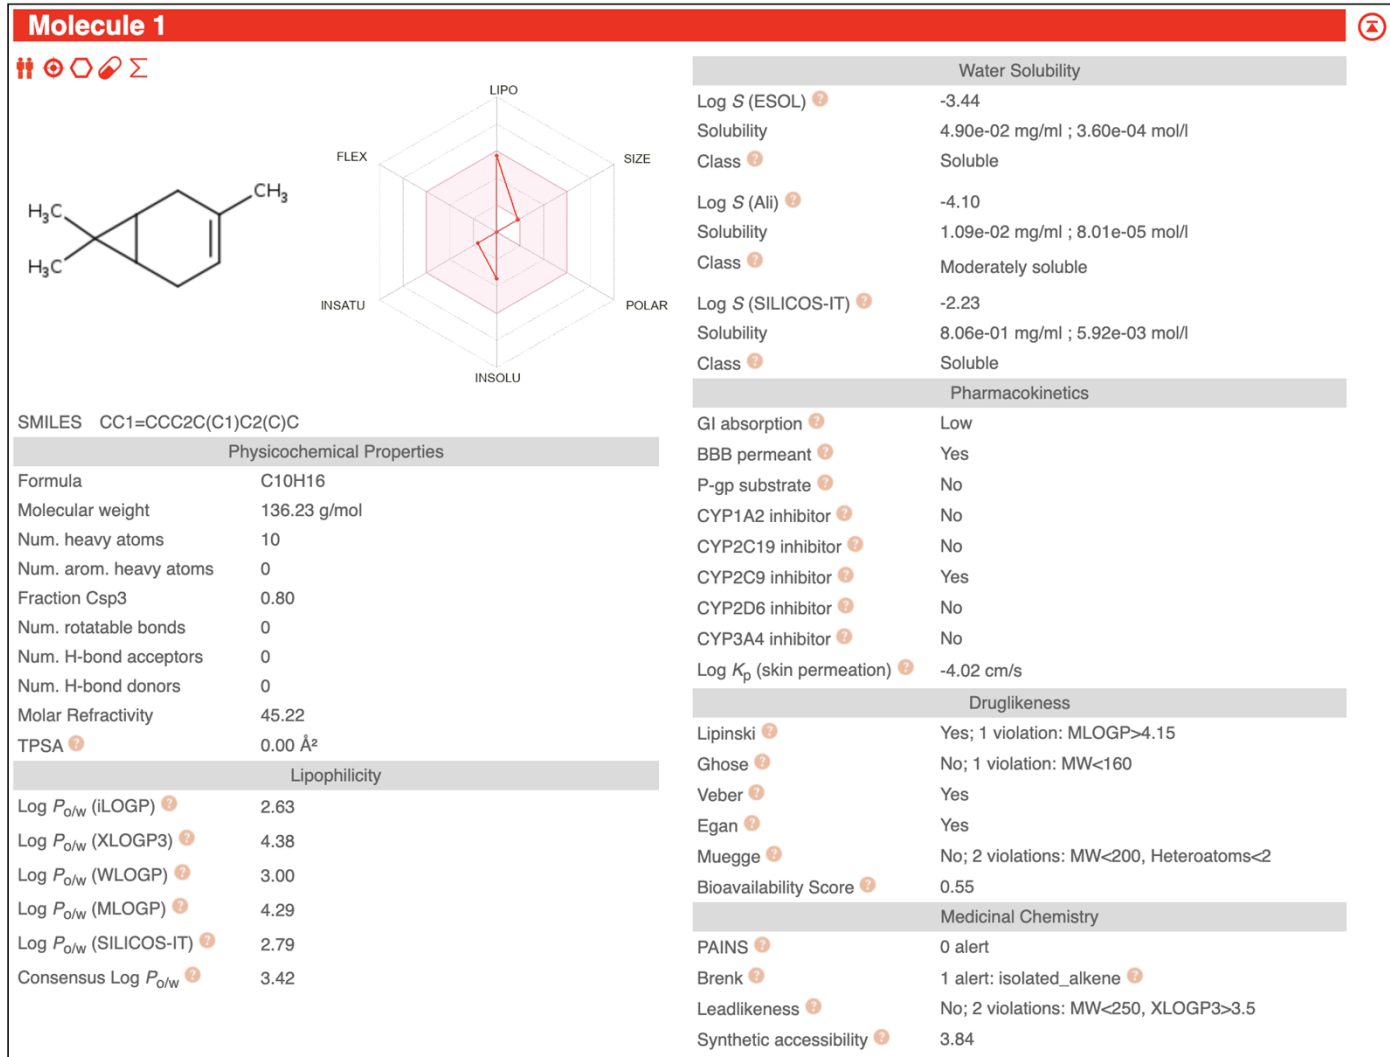

• **o-Cymene**

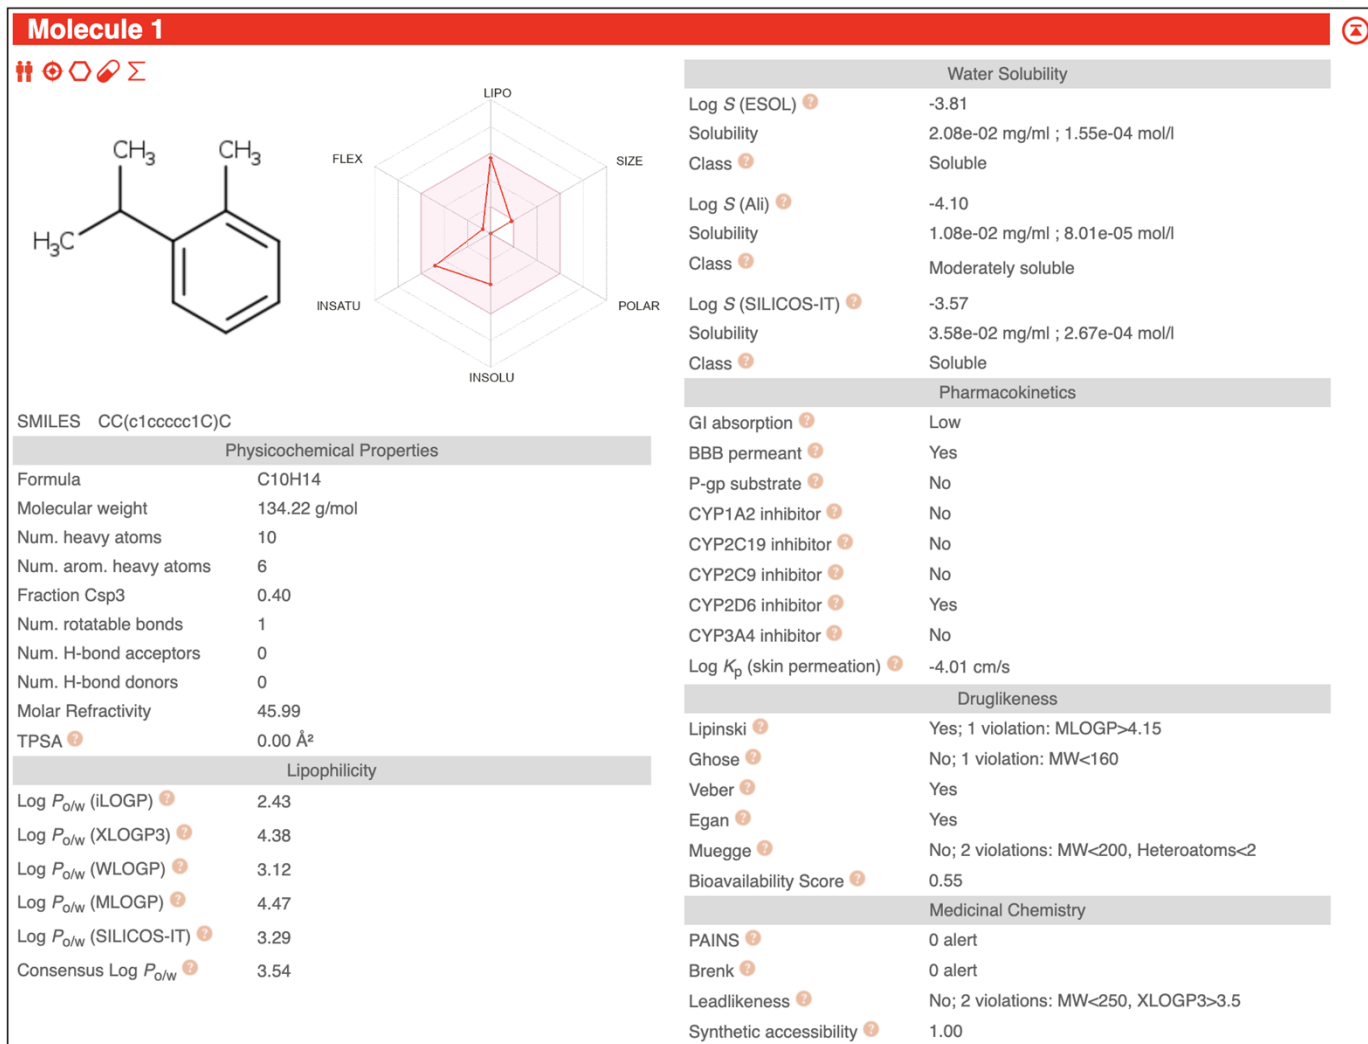

• Eucalyptol

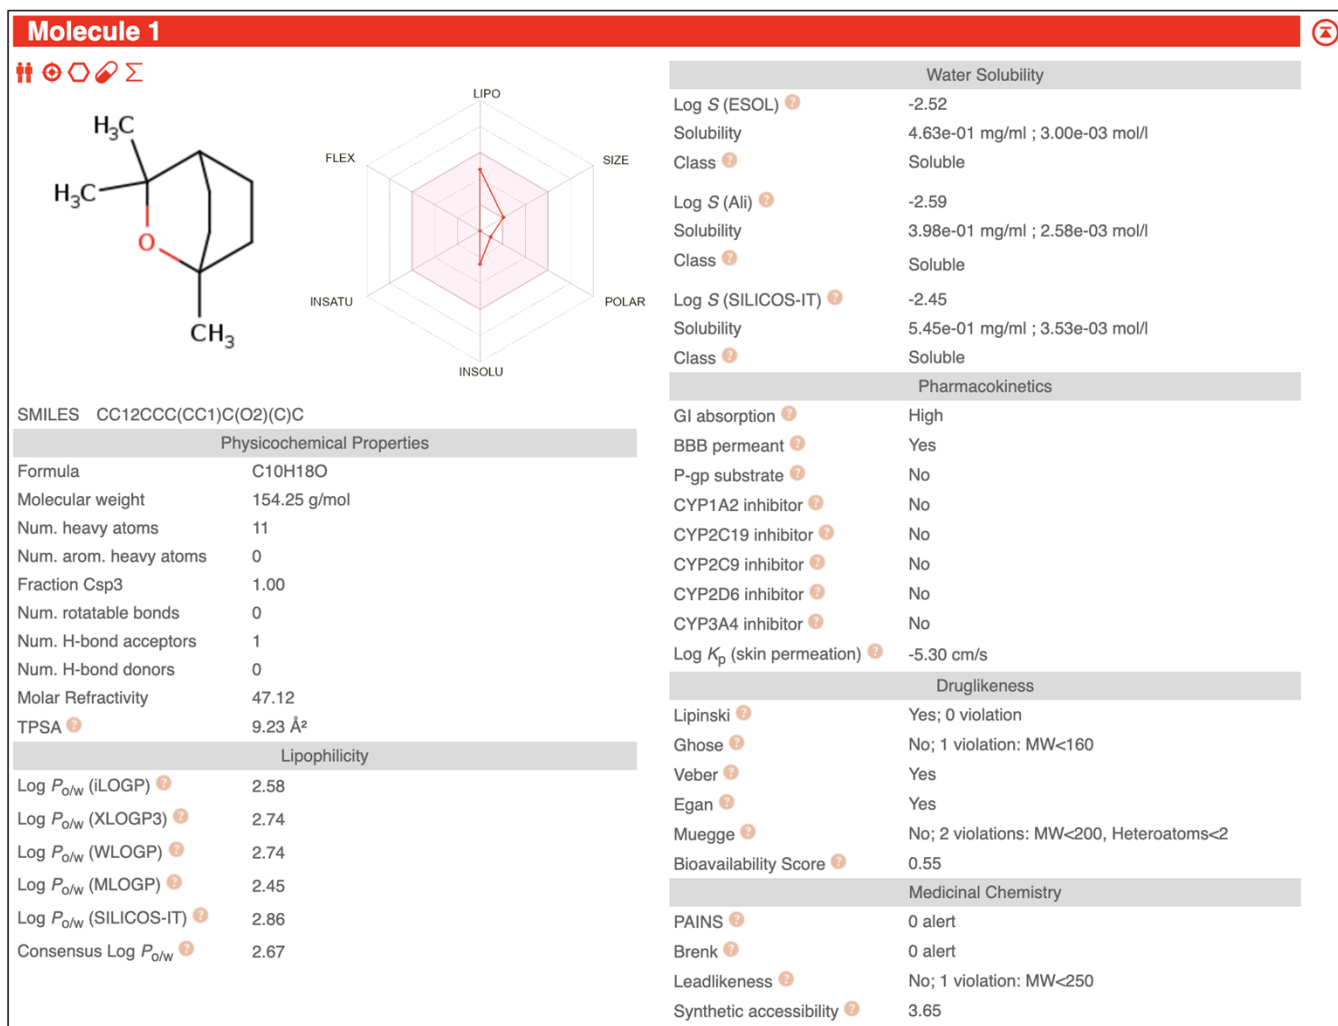

•  **$\beta$ -cis-Ocimene**

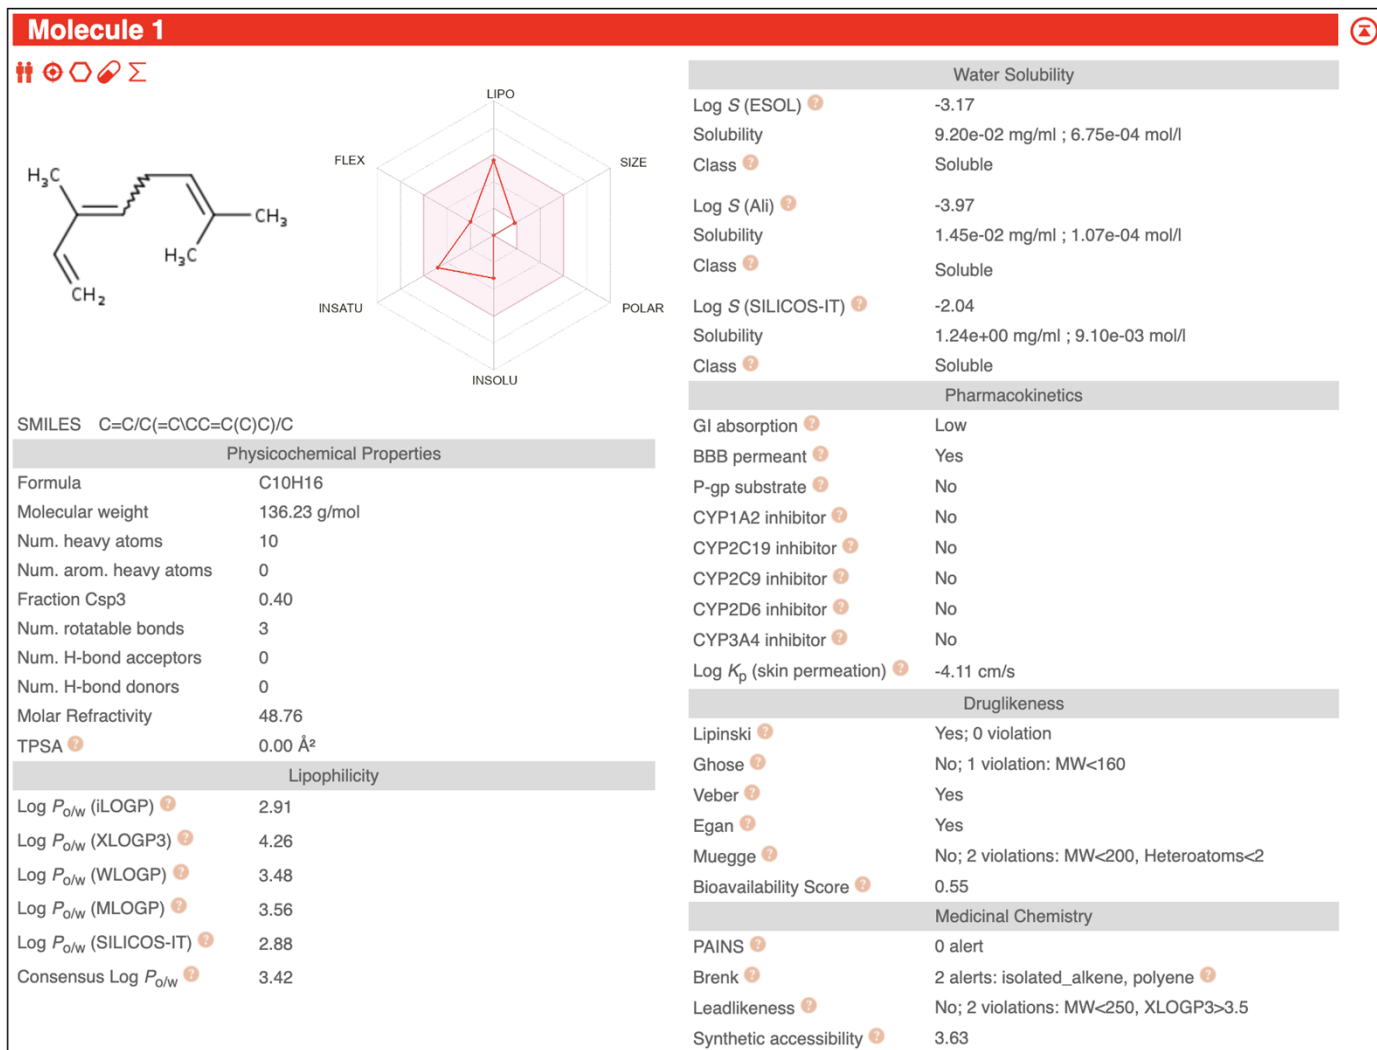

•  $\gamma$ -Terpinene

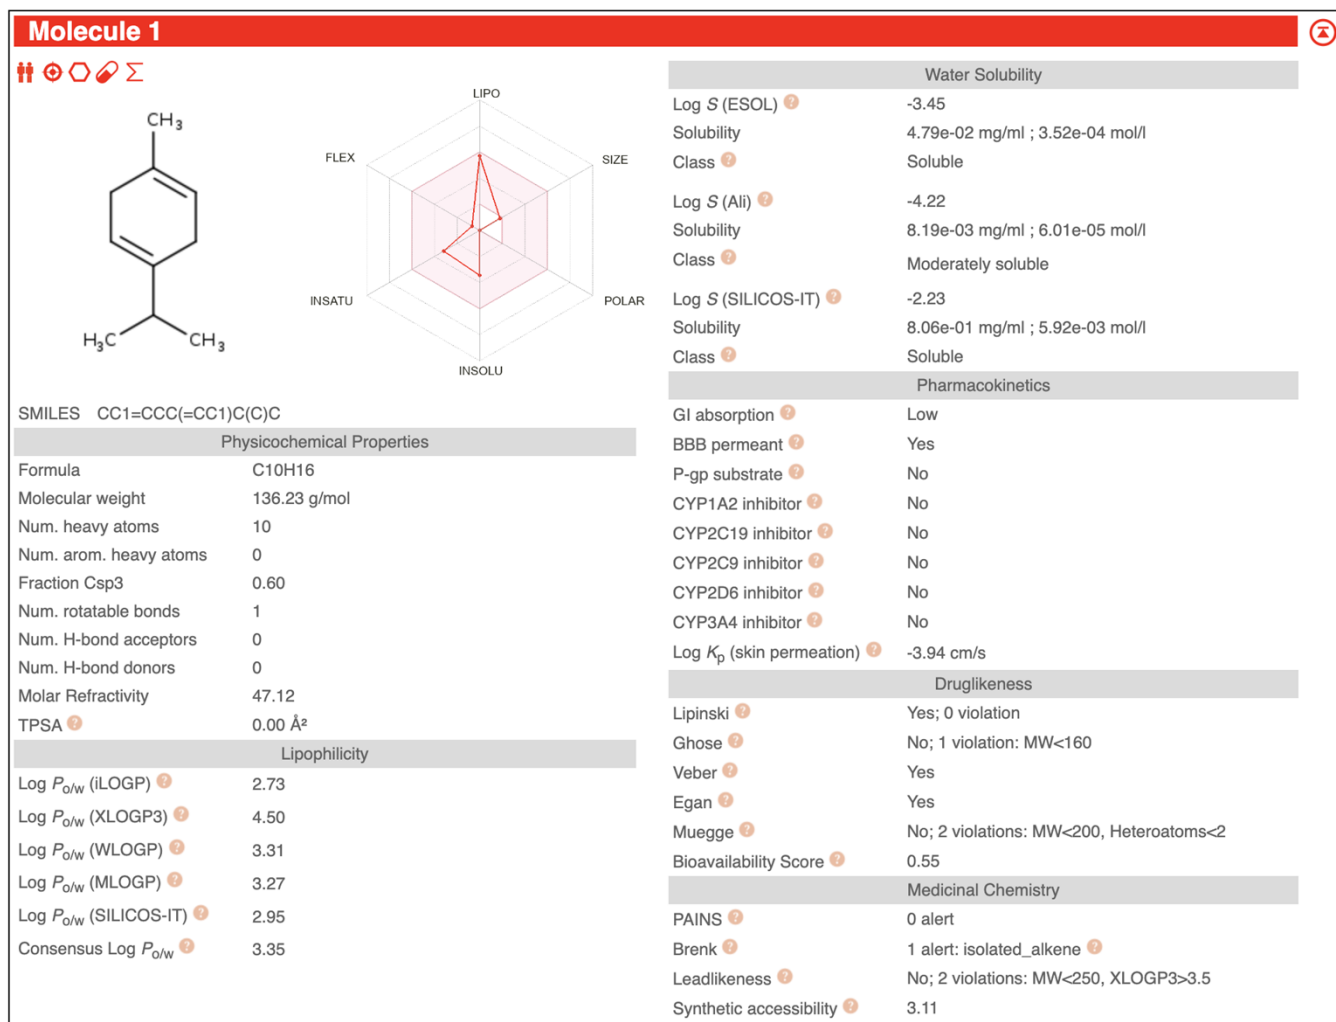

• Terpinen-4-ol

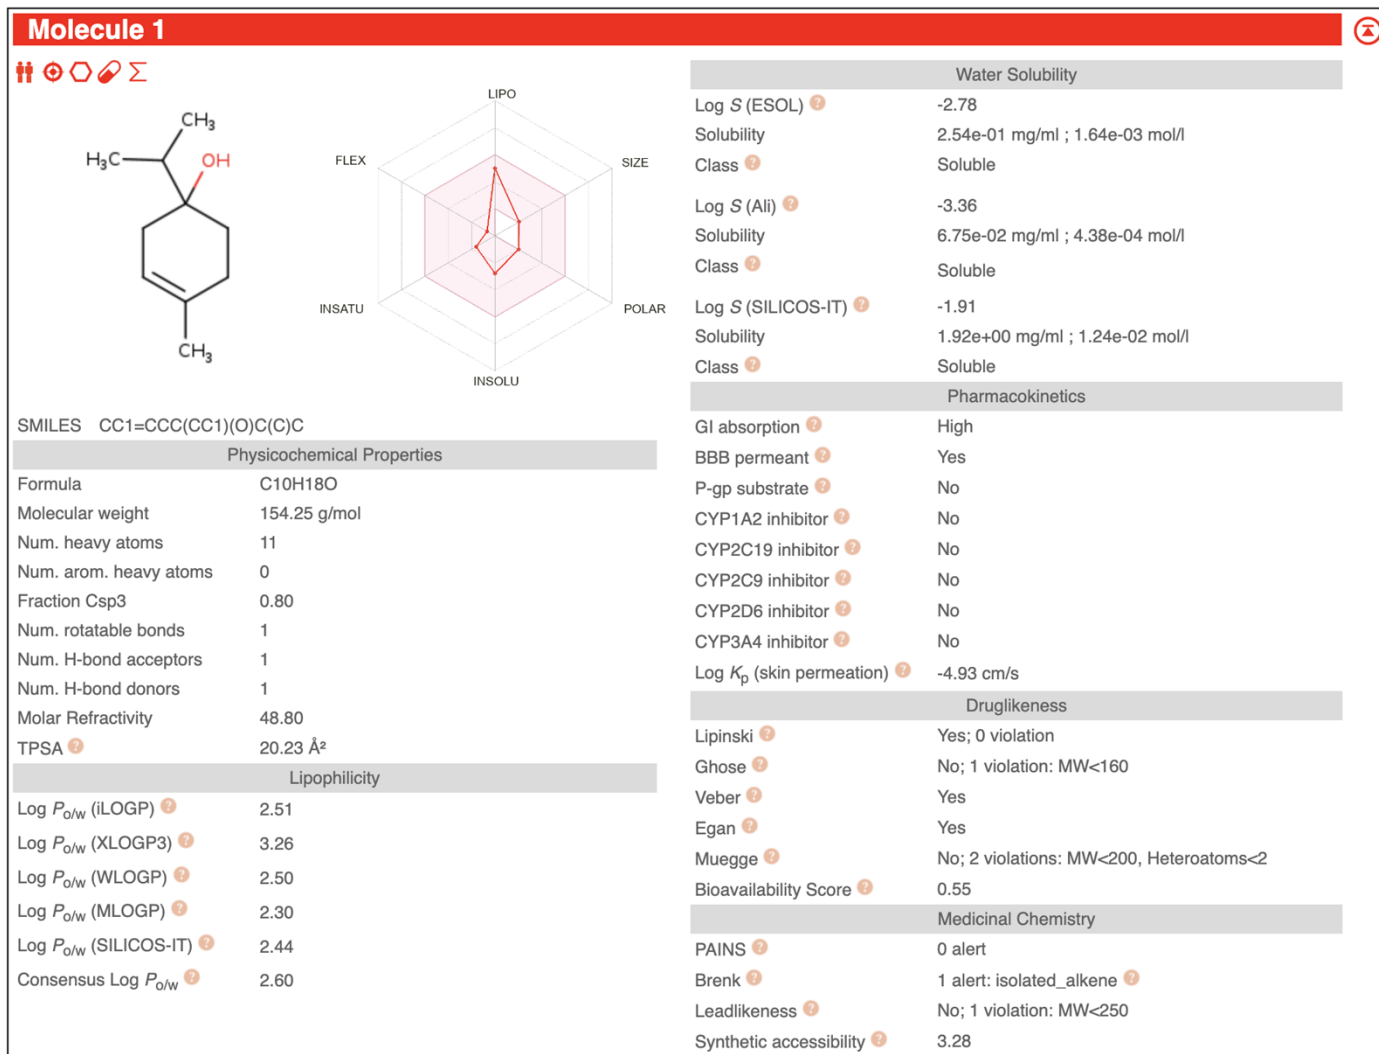



•  $\alpha$ -Copaene

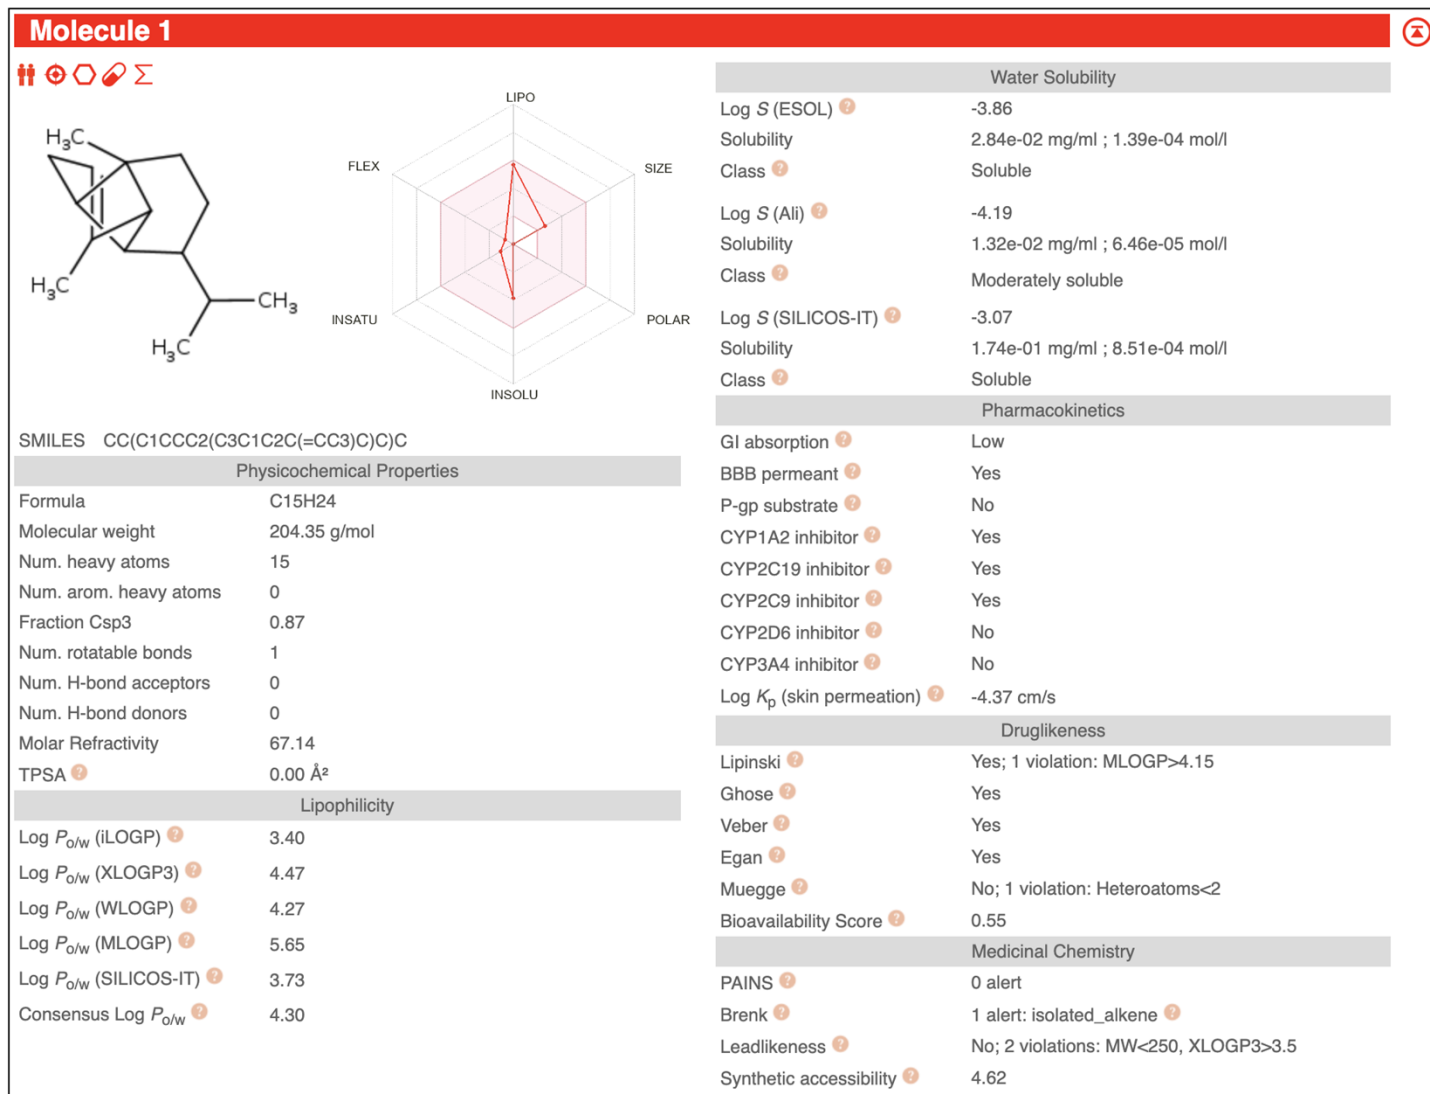

- Caryophyllene

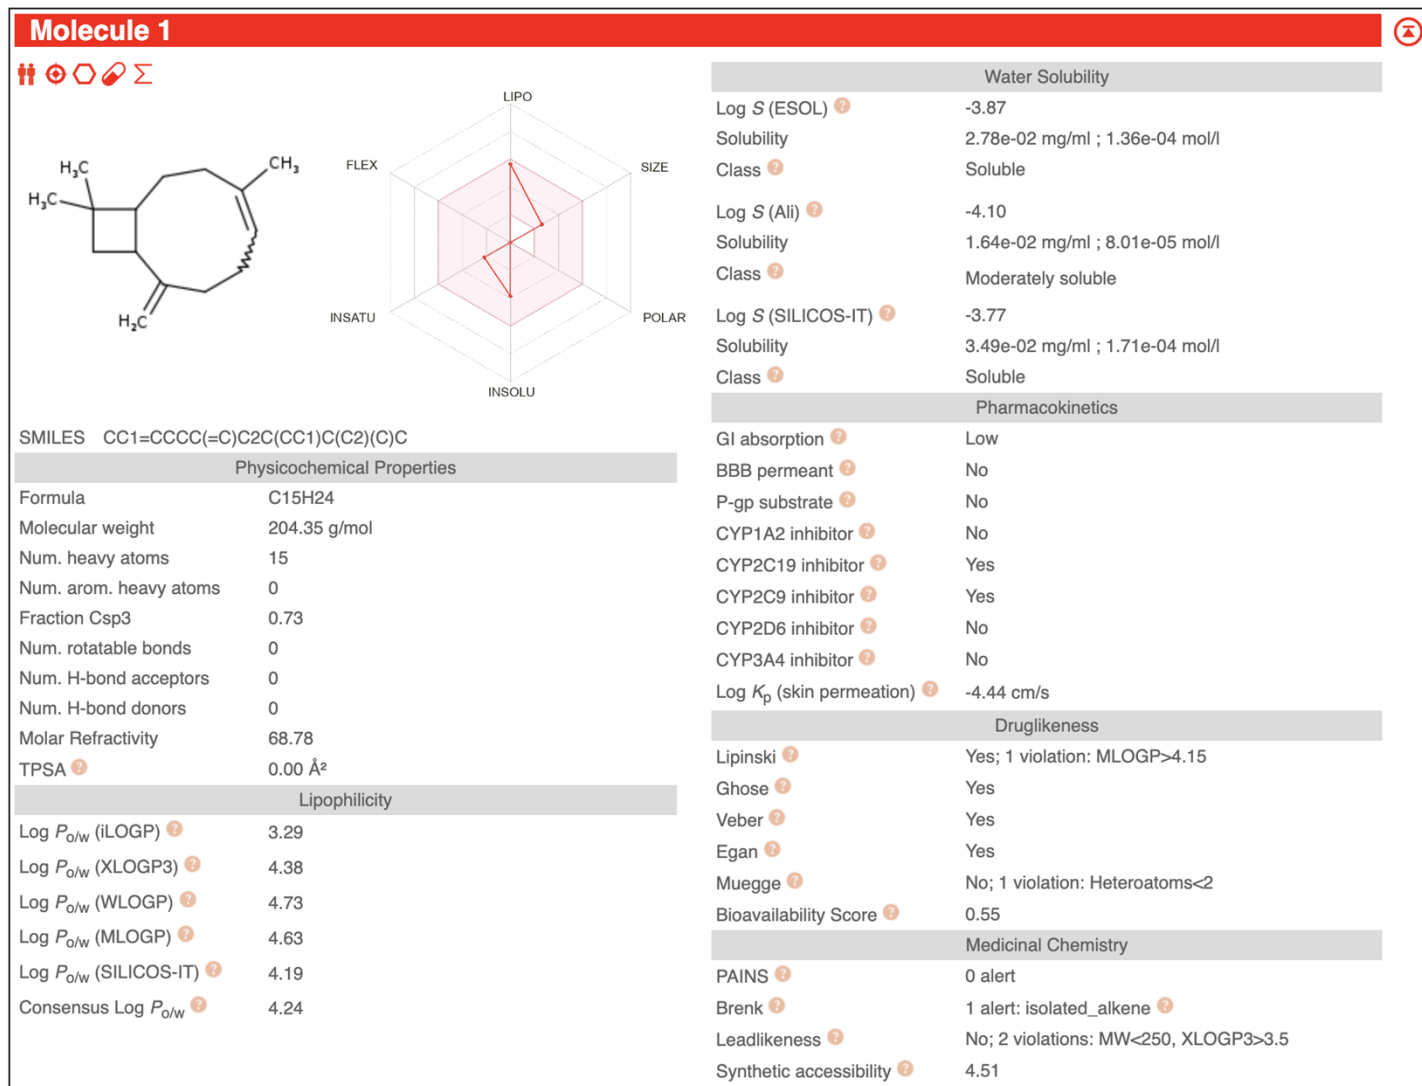

- Humulene

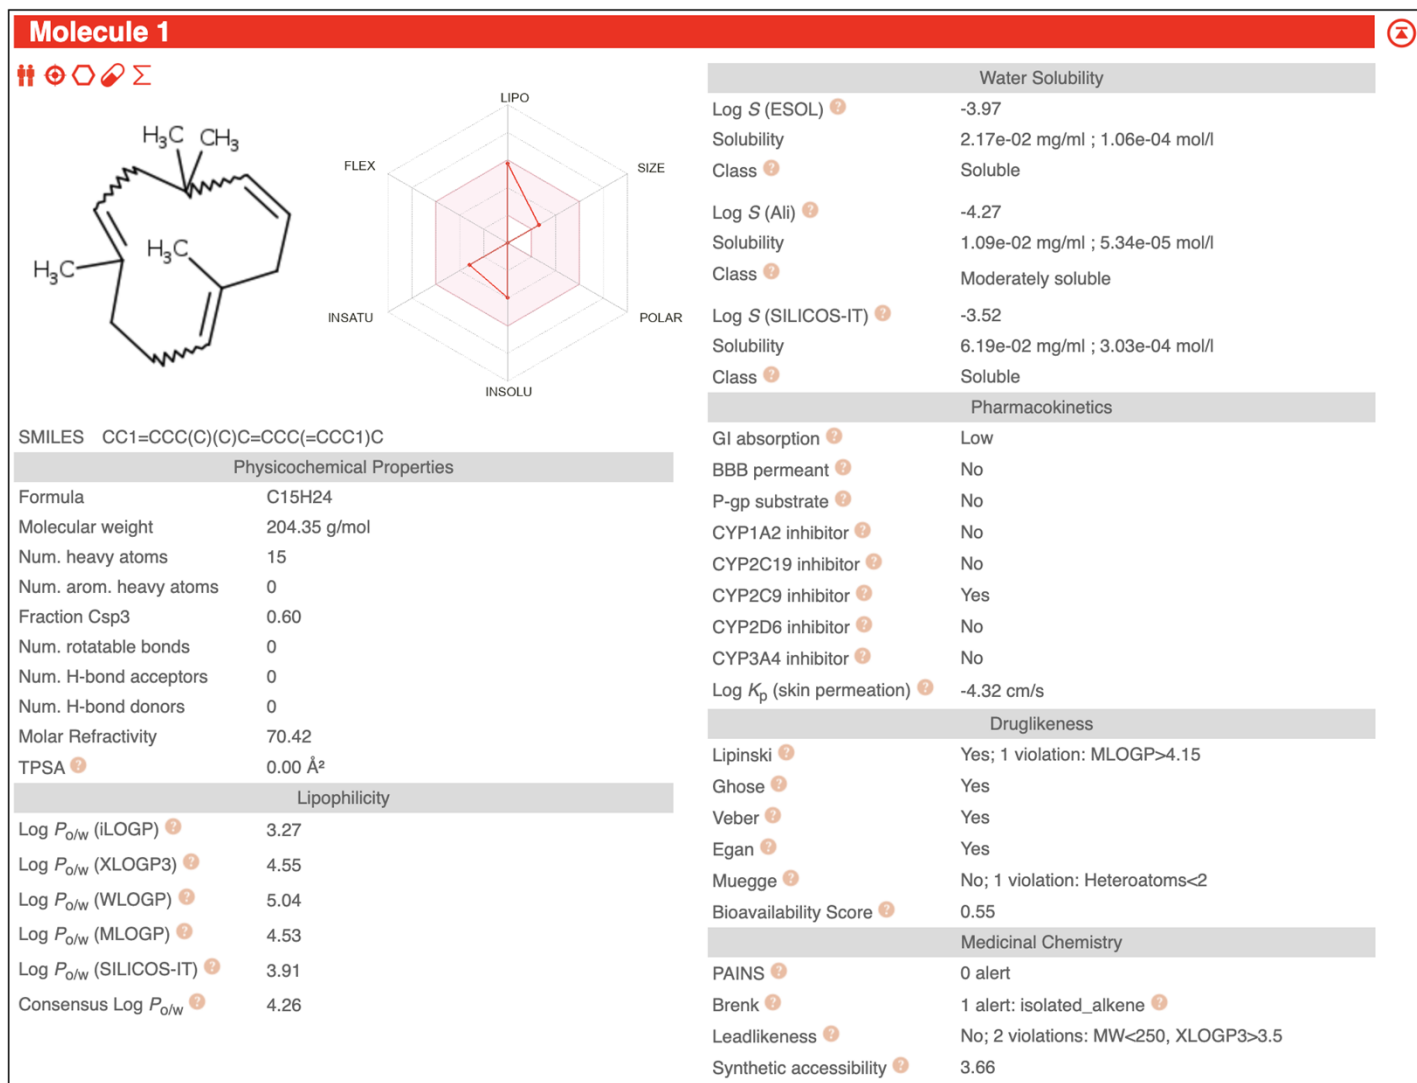

- Germacrene D

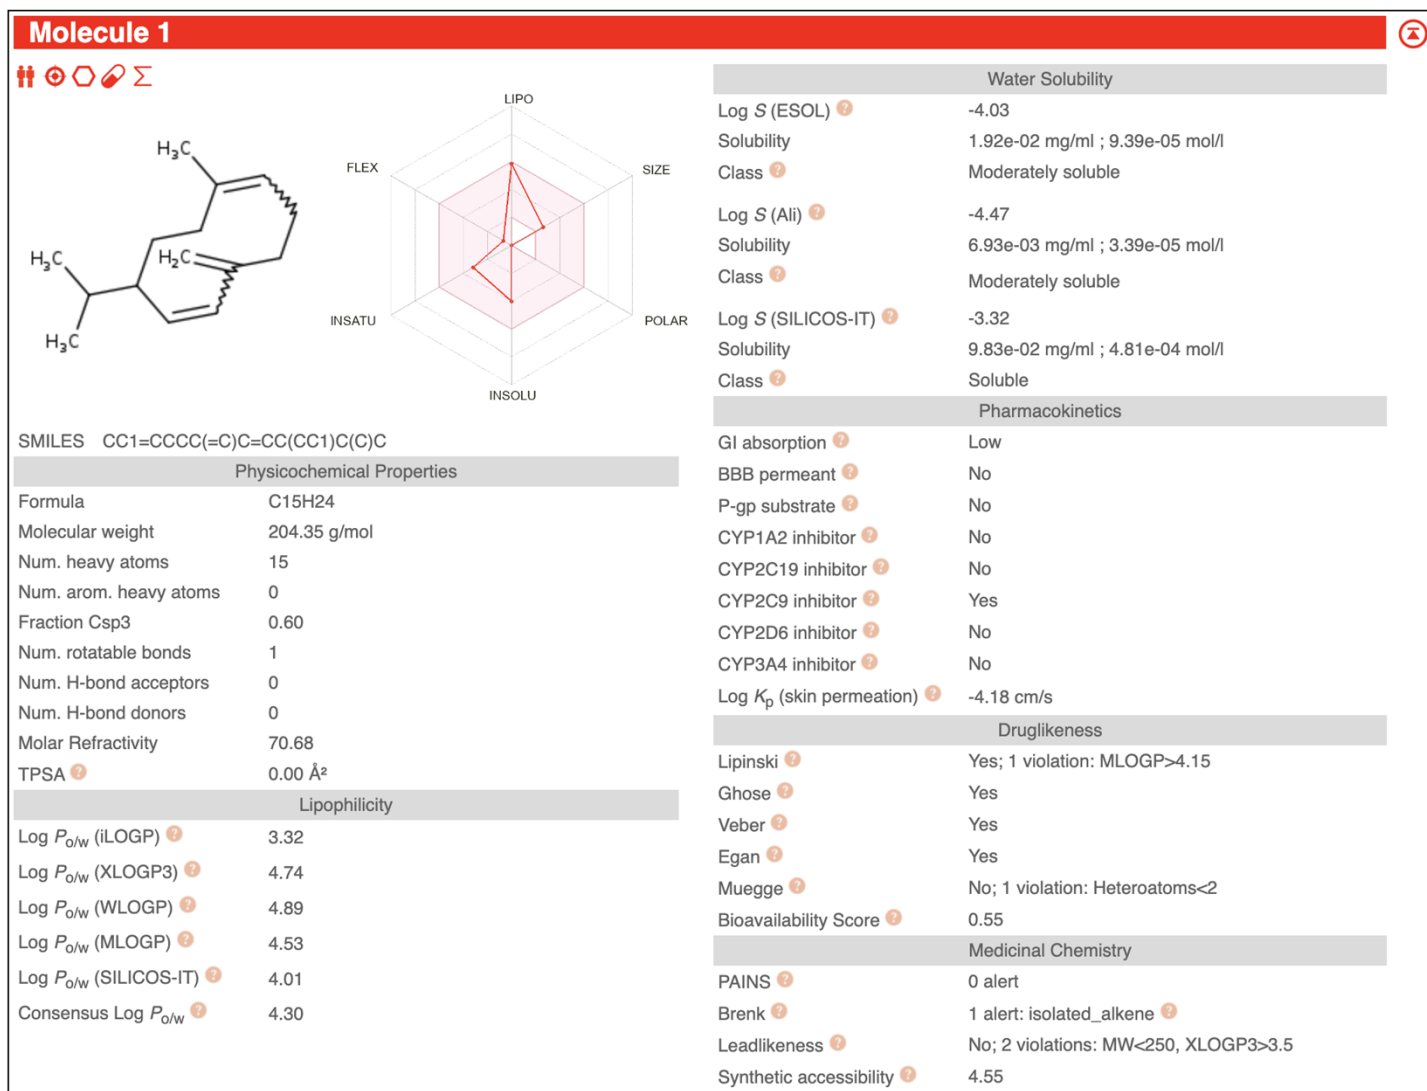

- Bicyclogermacrene

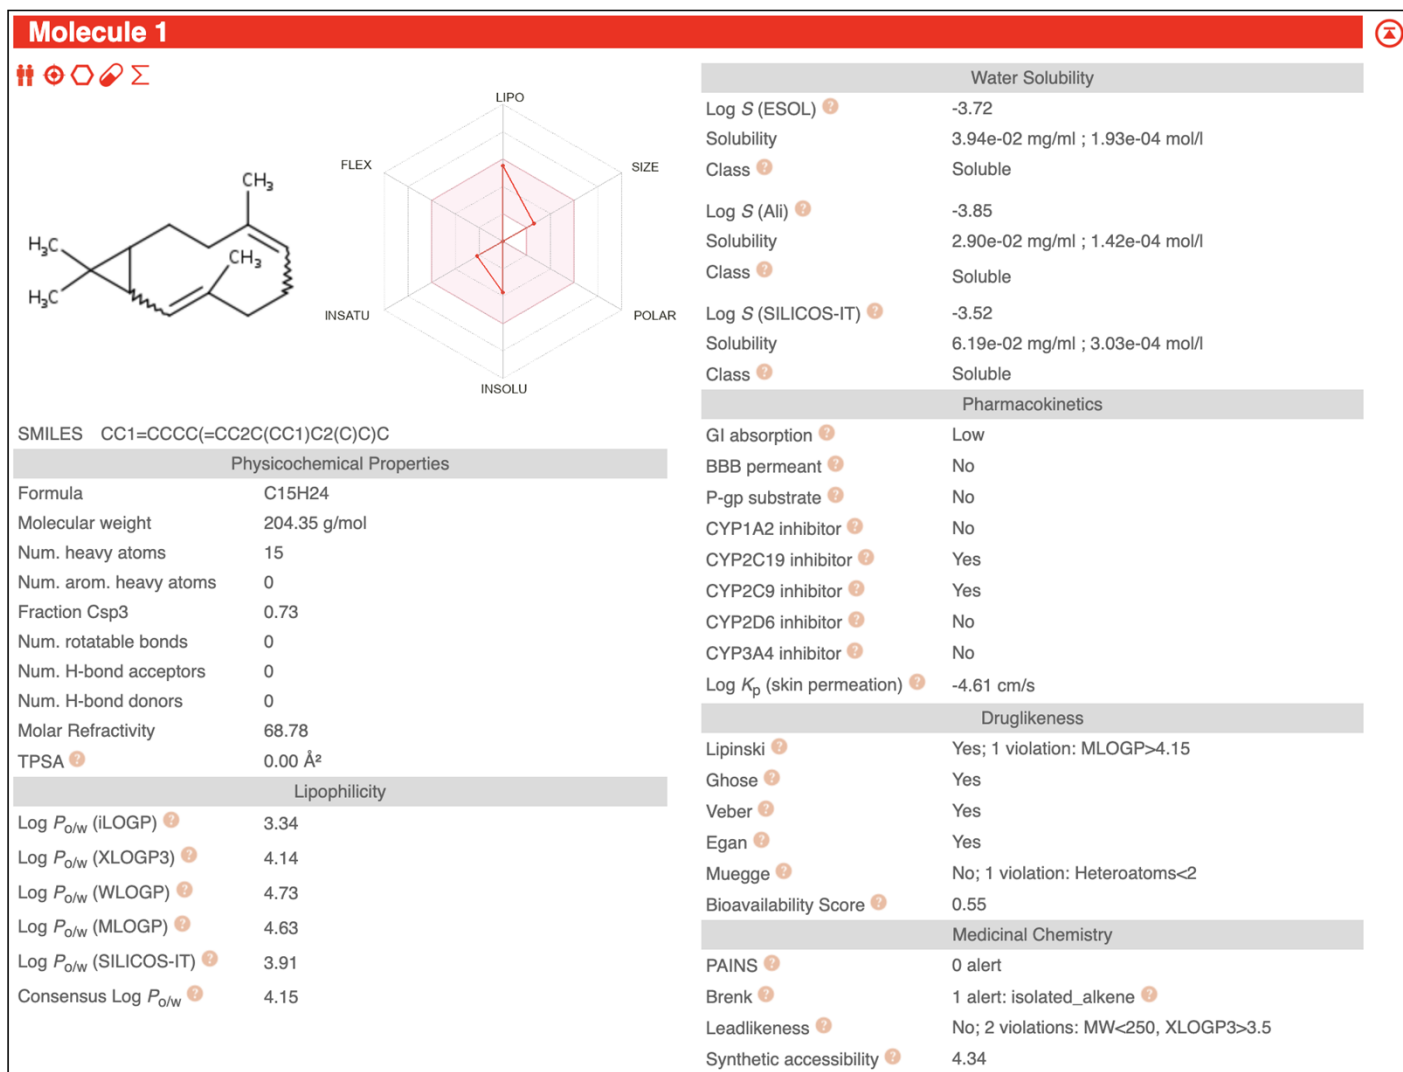

• Aromandendrene

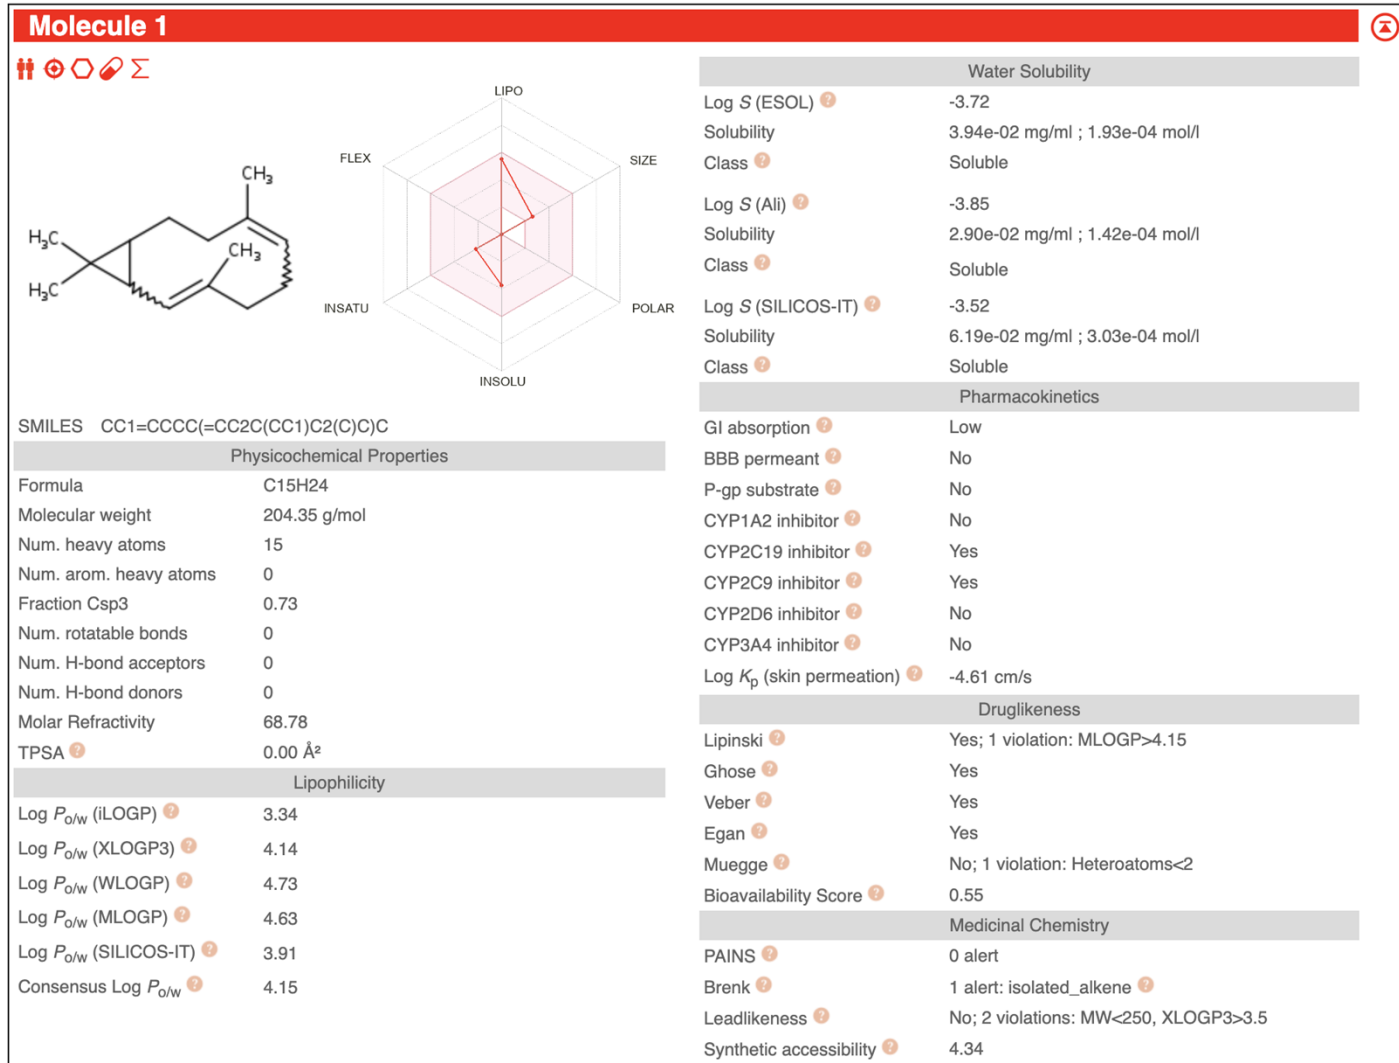

- trans-Nerolidol

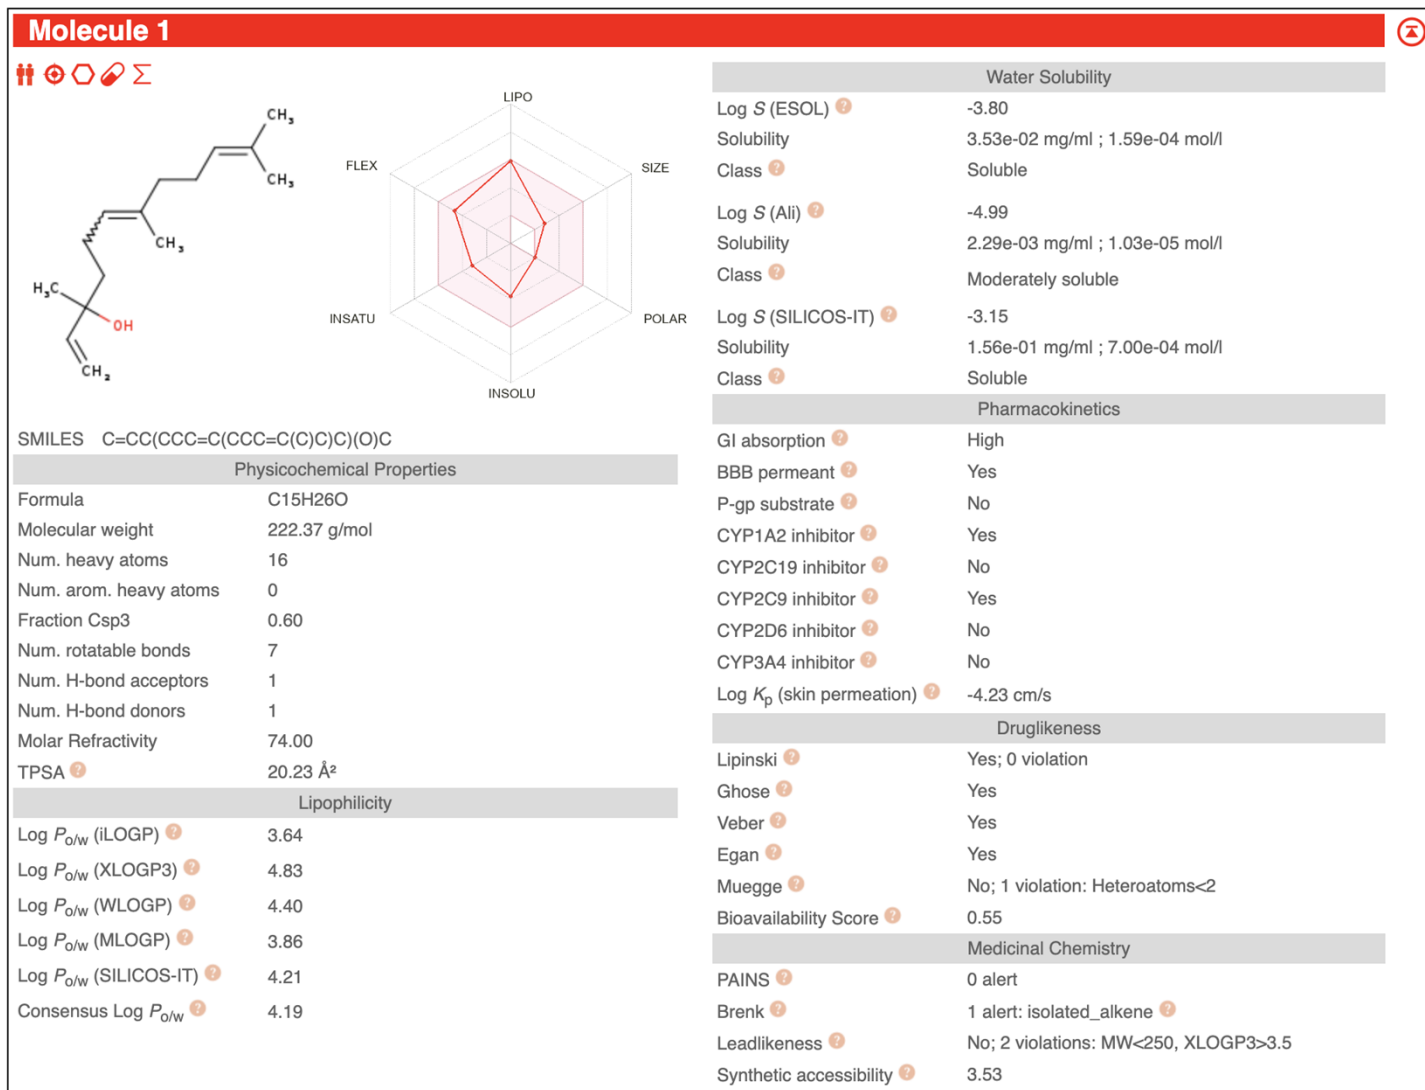

- Caryophyllene oxide

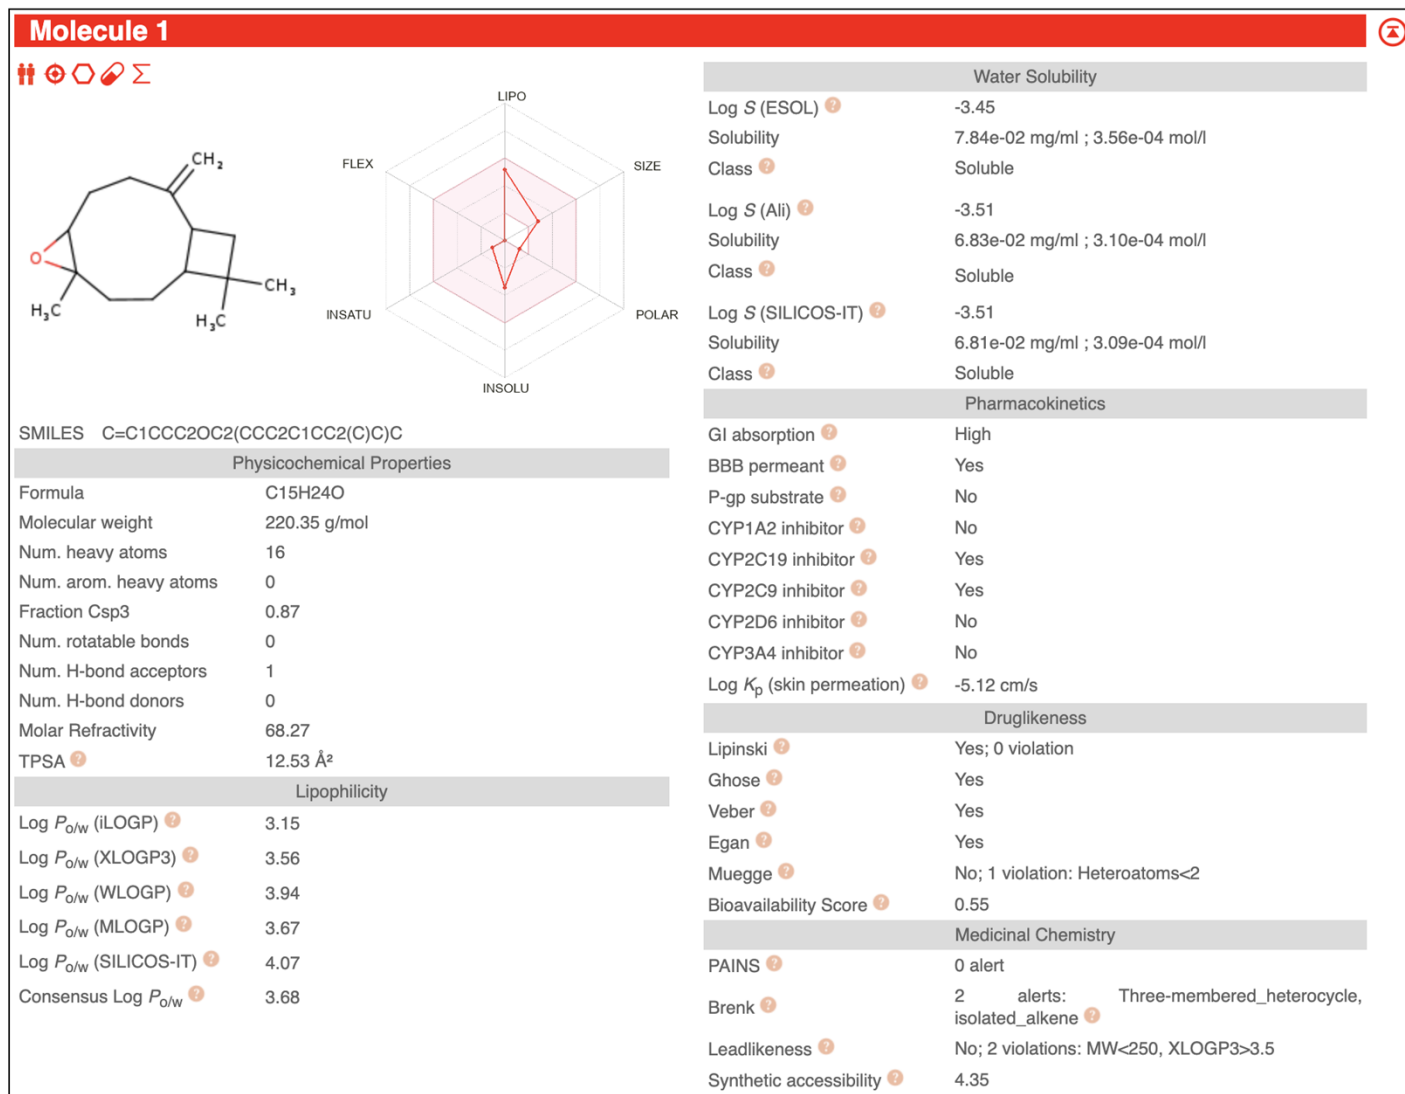



• Longifolenaldehyde

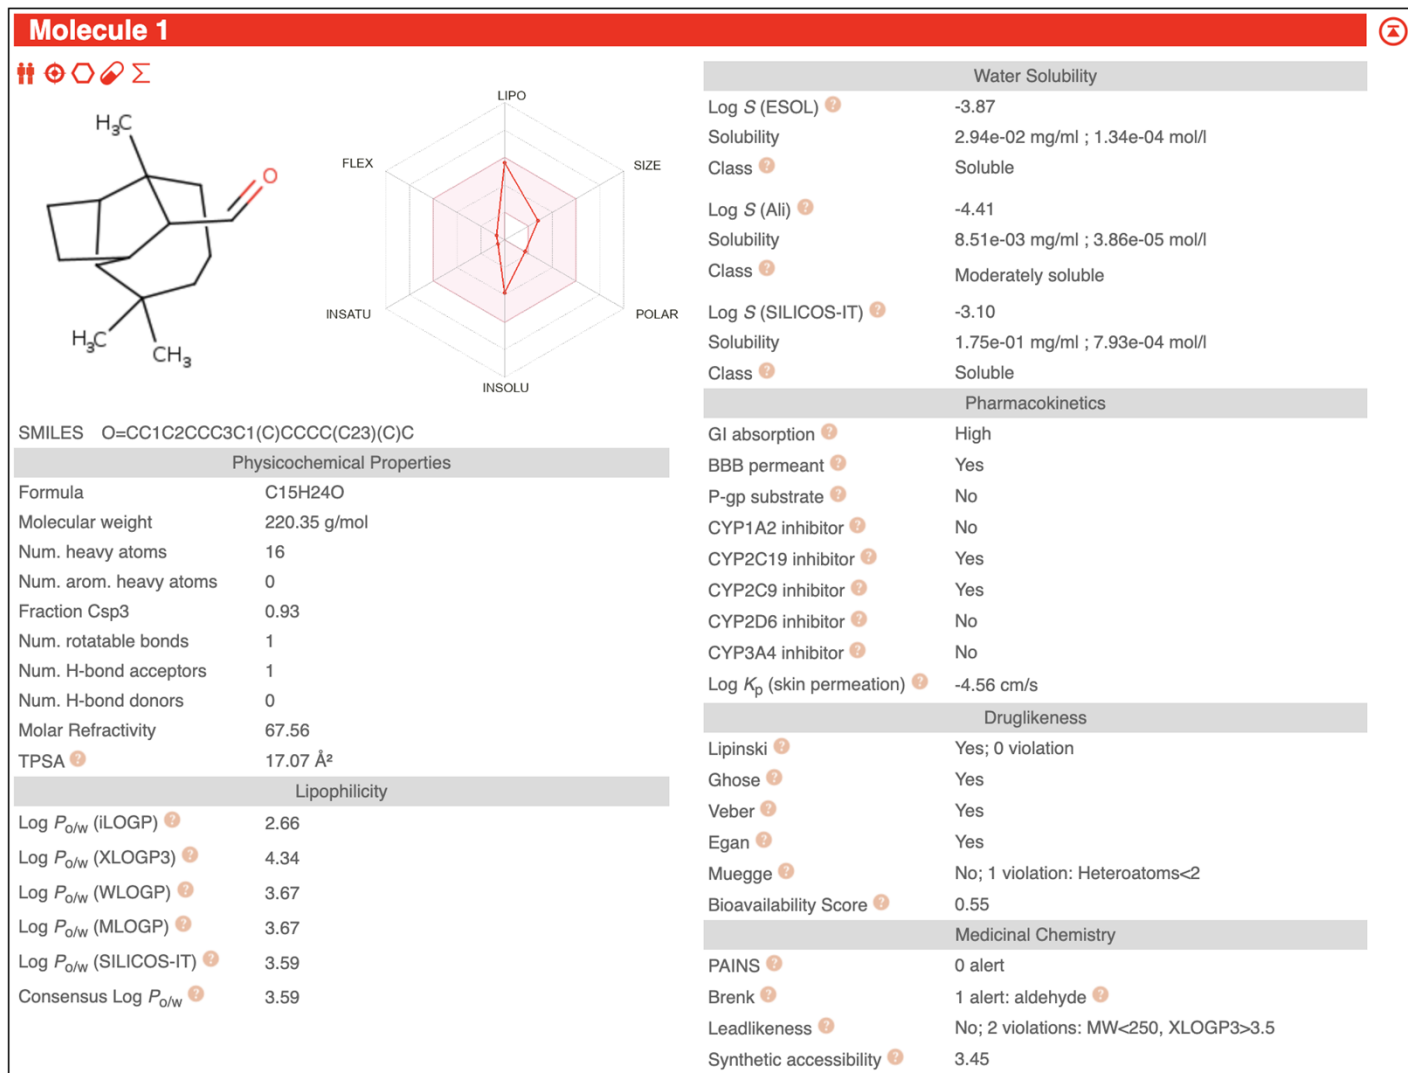

• Isospathulenol

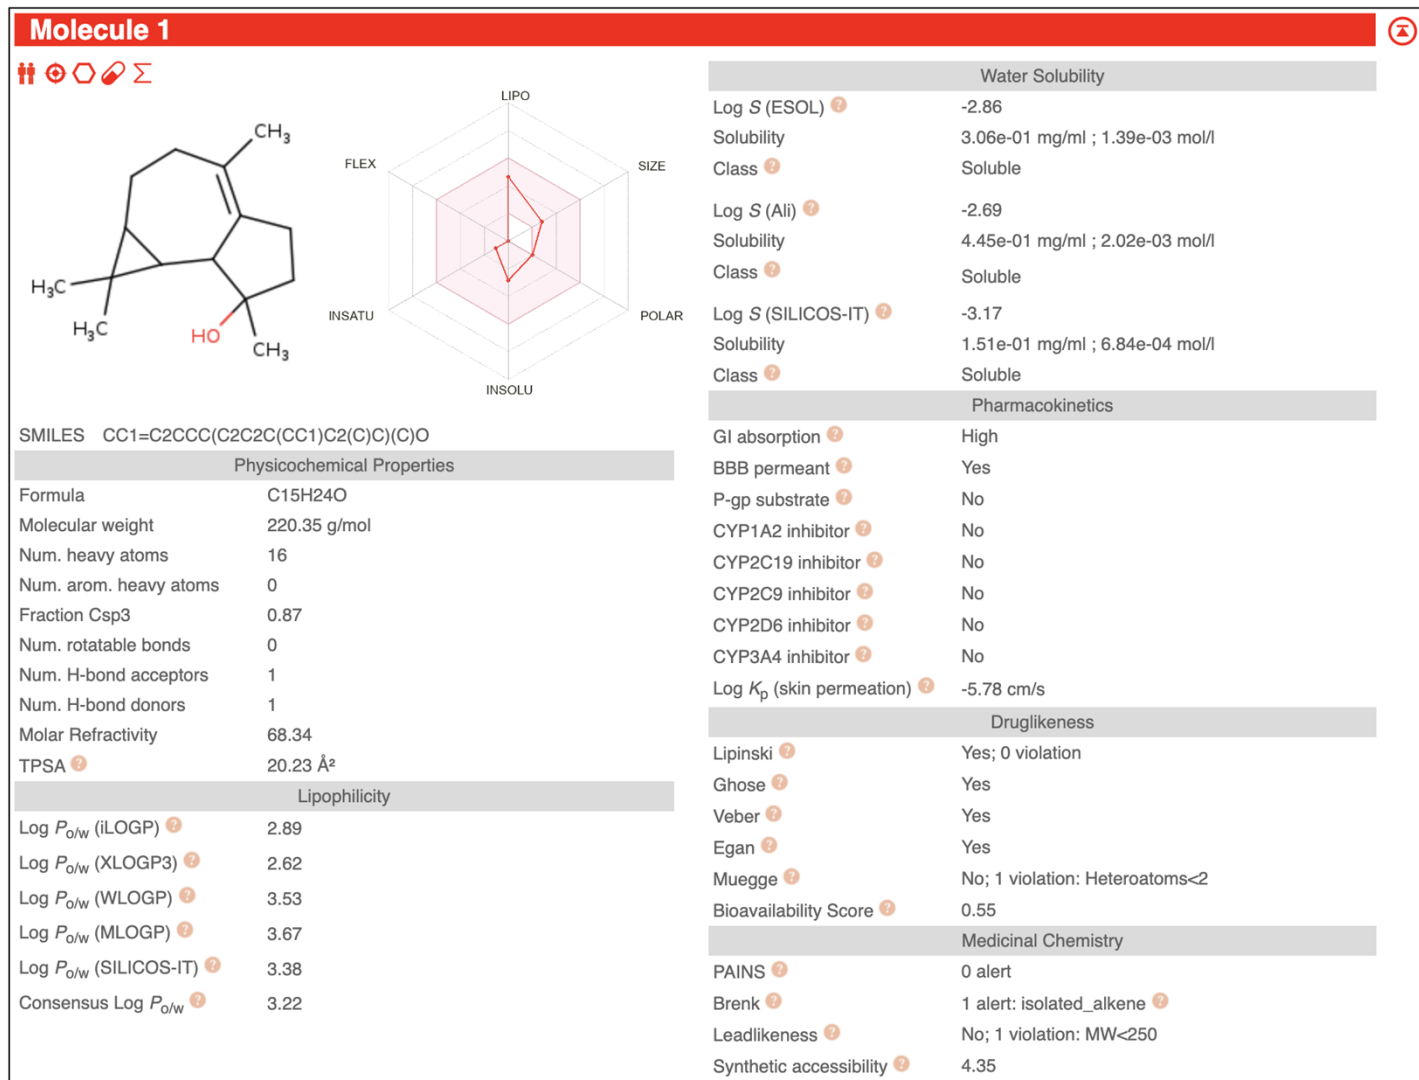

• Aromadendrene oxide I

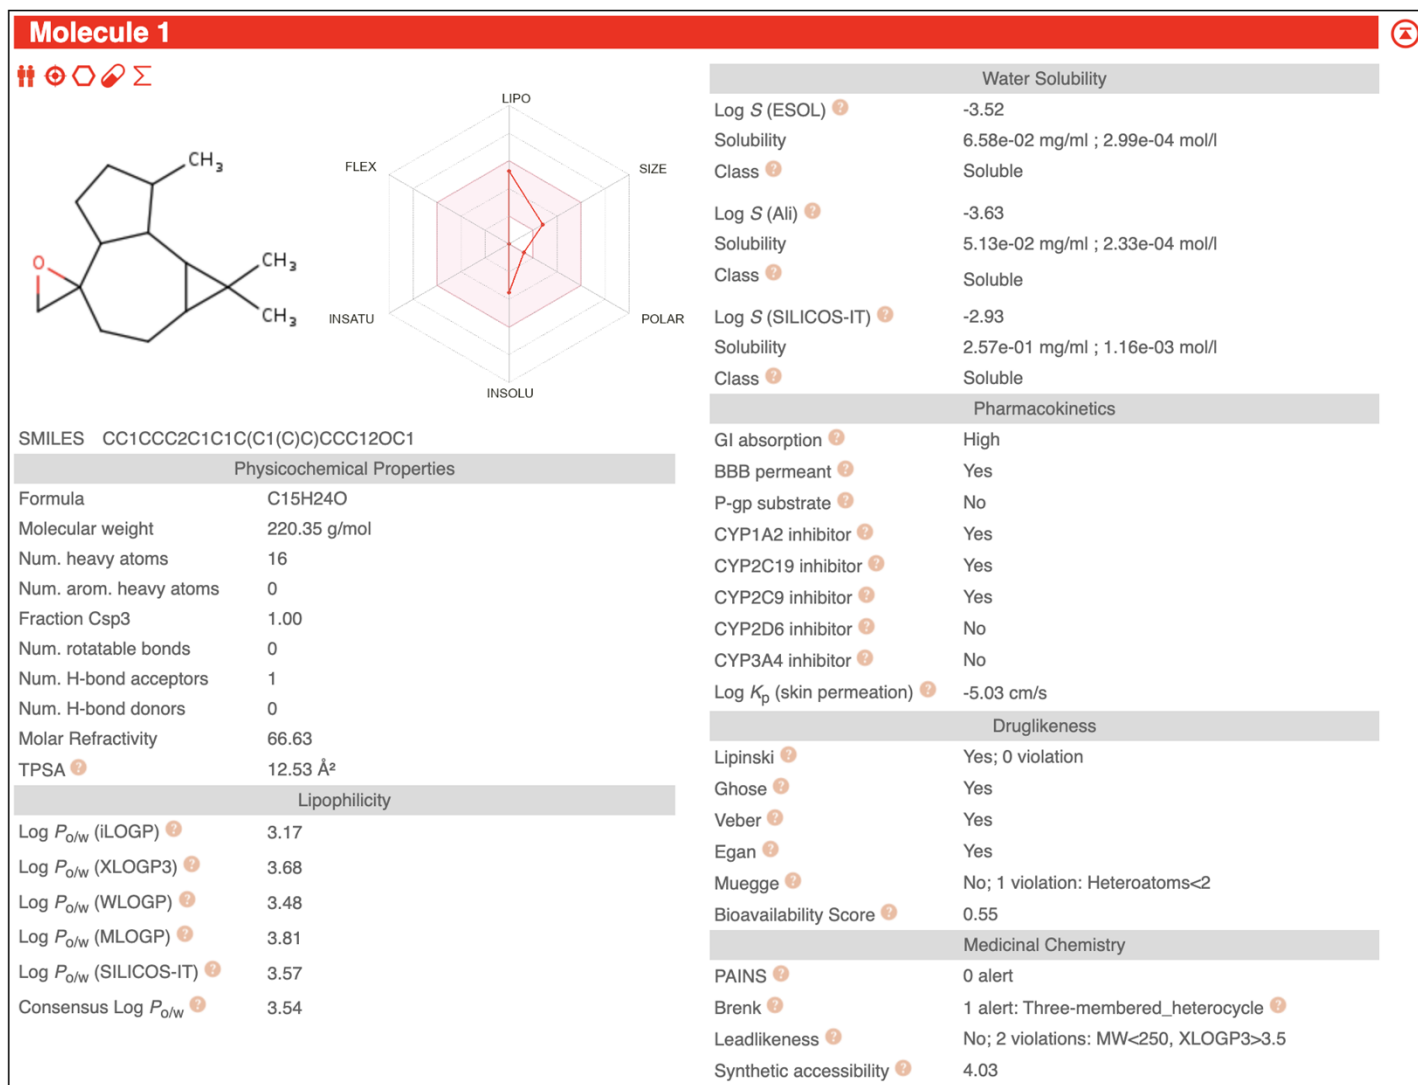

Supplement: d4ra04281f1.pdf [file d4ra04281f1.pdf]
